# Supplementary material for: Mesenchymal stromal cell aging impairs the self-organizing capacity of lung alveolar epithelial stem cells
Source: eLife. 2021 Sep 16;10:e68049. doi: 10.7554/eLife.68049 (PMC8445616; doi:10.7554/eLife.68049)
Supplement: Figure 1—source data 1. [file elife-68049-fig1-data1.xlsx]

## Sheet: Figure 1I
Young AEC2:Young MSC	Young AEC2:Aged MSC	Aged AEC2:Young MSC	Aged AEC2:Aged MSC
24	35	34	41
24	18	32	17
34	18	41	22
36	14	35	35
ANOVA summary									Number of families	1
F	2.039								Number of comparisons per family	6
P value	0.1622								Alpha	0.05
P value summary	ns
Significant diff. among means (P < 0.05)?	No								Tukey's multiple comparisons test	Mean Diff.	95.00% CI of diff.	Below threshold?	Summary	Adjusted P Value
R squared	0.3376								Young AEC2:Young MSC vs. Young AEC2:Aged MSC	8.25	-8.928 to 25.43	No	ns	0.5081	A-B
									Young AEC2:Young MSC vs. Aged AEC2:Young MSC	-6	-23.18 to 11.18	No	ns	0.7319	A-C
Brown-Forsythe test									Young AEC2:Young MSC vs. Aged AEC2:Aged MSC	0.75	-16.43 to 17.93	No	ns	0.9992	A-D
F (DFn, DFd)	1.461 (3, 12)								Young AEC2:Aged MSC vs. Aged AEC2:Young MSC	-14.25	-31.43 to 2.928	No	ns	0.1174	B-C
P value	0.2743								Young AEC2:Aged MSC vs. Aged AEC2:Aged MSC	-7.5	-24.68 to 9.678	No	ns	0.5823	B-D
P value summary	ns								Aged AEC2:Young MSC vs. Aged AEC2:Aged MSC	6.75	-10.43 to 23.93	No	ns	0.6578	C-D
Are SDs significantly different (P < 0.05)?	No
									Test details	Mean 1	Mean 2	Mean Diff.	SE of diff.	n1	n2	q	DF
Bartlett's test									Young AEC2:Young MSC vs. Young AEC2:Aged MSC	29.5	21.25	8.25	5.786	4	4	2.016	12
Bartlett's statistic (corrected)	2.897								Young AEC2:Young MSC vs. Aged AEC2:Young MSC	29.5	35.5	-6	5.786	4	4	1.466	12
P value	0.4078								Young AEC2:Young MSC vs. Aged AEC2:Aged MSC	29.5	28.75	0.75	5.786	4	4	0.1833	12
P value summary	ns								Young AEC2:Aged MSC vs. Aged AEC2:Young MSC	21.25	35.5	-14.25	5.786	4	4	3.483	12
Are SDs significantly different (P < 0.05)?	No								Young AEC2:Aged MSC vs. Aged AEC2:Aged MSC	21.25	28.75	-7.5	5.786	4	4	1.833	12
									Aged AEC2:Young MSC vs. Aged AEC2:Aged MSC	35.5	28.75	6.75	5.786	4	4	1.65	12
ANOVA table	SS	DF	MS	F (DFn, DFd)	P value
Treatment (between columns)	409.5	3	136.5	F (3, 12) = 2.039	P=0.1622
Residual (within columns)	803.5	12	66.96
Total	1213	15
Data summary
Number of treatments (columns)	4
Number of values (total)	16

## Sheet: Figure 1J
Young AEC2:Young L-MSC (YY)				Young AEC2:Aged L-MSC (YO)				Aged AEC2:Young L-MSC(OY)				Aged AEC2:Aged L-MSC (OO)					YY-pooled	YO-pooled	OY-pooled	OO-pooled		Transform	YY-pooled	YO-pooled	OY-pooled	OO-pooled		Table Analyzed	Transform of Alveolosphere_All values
0.0139177	0.0147452	0.0095026	0.0100442	0.00271854	0.00637281	0.00218845	0.00248391	0.00571548	0.00351278	0.000273287	0.00396331	0.00122001	0.00153828	0.00132932	0.00171947		0.0139177	0.00271854	0.00571548	0.00122001		Y= Ln (Y)	-4.27459	-5.90766	-5.16458	-6.70889		ANOVA summary
0.00582601	0.00038712	0.00039378	0.00592297	0.00201959	0.00030791	0.00067195	0.00635297	0.00224013	0.00575211	0.00403926	0.00386398	0.0014219	0.00022165	5.3322e-05	0.000324304		0.00582601	0.00201959	0.00224013	0.0014219			-5.14542	-6.20486	-6.10122	-6.55576		F	13.77
0.00565938	0.0067427	0.0136932	0.0184669	0.00152457	0.00090734	0.0005886	0.00515867	0.00235202	0.00062692	0.000470401	0.00427505	0.00256635	0.0209047	5.2646e-05	0.00867854		0.00565938	0.00152457	0.00235202	0.00256635			-5.17444	-6.48604	-6.05248	-5.96527		P value	<0.0001
0.0109922	0.00031338	0.0178733	0.00135583	0.00048206	0.00074981	0.00270239	0.00321531	0.0629725	0.00077461	0.000643838	0.0156348	0.000426576	0.00062385	0.00417896	0.000919017		0.0109922	0.00048206	0.0629725	0.000426576			-4.51057	-7.63744	-2.76506	-7.75972		P value summary	****
0.0105339	0.019806	0.0241702	0.00348694	0.00578661	0.00251219	0.00179888	0.0105134	0.00201047	0.0231669	0.00104284	0.0130038	0.00465732	0.00534349	0.00025165	0.00316677		0.0105339	0.00578661	0.00201047	0.00465732			-4.55315	-5.15221	-6.20939	-5.36932		Significant diff. among means (P < 0.05)?	Yes
0.0105065	0.010425	0.00214005	0.00036981	0.00231134	0.00076957	0.00054244	0.009602	0.0147101	0.00399942	4.75385e-05	0.0117502	0.00720988	0.0322343	8.3403e-05	0.000345518		0.0105065	0.00231134	0.0147101	0.00720988			-4.55576	-6.06993	-4.21922	-4.9323		R squared	0.08305
0.0264966	0.00976917	0.0061738	0.0266413	0.00091609	0.00390749	0.00384139	0.00079958	0.0428761	0.0044978	0.000981752	0.0011101	0.000682015	0.00908648	0.000147	0.000444286		0.0264966	0.00091609	0.0428761	0.000682015			-3.63074	-6.9954	-3.14944	-7.29046
0.00032841	0.00027677	0.00052384	0.00525213	0.00119695	0.00135546	0.00079699	0.00422194	0.0245192	0.00225399	0.00798957	0.0132034	0.000804561	0.00029923	0.00023368	9.02967e-05		0.00032841	0.00119695	0.0245192	0.000804561			-8.02125	-6.72798	-3.7083	-7.12521		Brown-Forsythe test
0.00613457	0.00385702	0.00515036	0.00064816	0.0377297	0.00761451	0.00395761	0.0116773	0.00572839	0.00085822	0.001412	0.048399	0.0148918	0.0003986	0.00265986	0.000116409		0.00613457	0.0377297	0.00572839	0.0148918			-5.09382	-3.27731	-5.16232	-4.20695		F (DFn, DFd)	3.286 (3, 456)
0.0325366	0.00130409	0.00160036	0.0028876	0.0036184	0.00020716	0.00157807	0.00852905	0.00183545	0.0071569	0.000589019	0.00056313	0.00164874	0.00114422	0.00023036	0.000661975		0.0325366	0.0036184	0.00183545	0.00164874			-3.42539	-5.62172	-6.30047	-6.40774		P value	0.0207
0.00226104	0.00312801	0.0131479	0.00289283	0.00045959	0.0002212	0.00368175	0.0007546	0.0230249	0.00064075	0.00390887	0.00369567	0.00607406	0.00024478	0.00021616	0.000723987		0.00226104	0.00045959	0.0230249	0.00607406			-6.09193	-7.68518	-3.77118	-5.10373		P value summary	*
0.00395689	0.00534143	0.0197625	0.0098468	0.00091084	0.00547202	0.00560753	0.0023767	0.00630601	0.0203355	0.00715001	0.00355458	0.000674088	0.0298999	0.00072467	0.0182931		0.00395689	0.00091084	0.00630601	0.000674088			-5.5323	-7.00114	-5.06625	-7.30215		Are SDs significantly different (P < 0.05)?	Yes
0.0204235	0.0270434	0.00153637	0.00012566	0.00206768	0.00457918	0.00664158	0.00072835	0.00061333	0.00096756	0.0032549	0.000869859	0.0113996	0.00032348	0.0075656	0.00478443		0.0204235	0.00206768	0.00061333	0.0113996			-3.89107	-6.18133	-7.39661	-4.47418
0.00235325	0.00579108	0.0211683	0.0009542	0.00213936	0.00074326	0.0727163	0.00010312	0.0010987	0.0009464	0.0102722	0.00172709	0.00431506	0.00051563	0.00062058	0.00567931		0.00235325	0.00213936	0.0010987	0.00431506			-6.05196	-6.14725	-6.81363	-5.44564		Bartlett's test
0.0268442	0.00052339	0.00024048	0.0155098	0.00166155	0.00123741	0.0135668		0.00572516	0.0671777	0.00237948	0.000695749	0.0119151	0.00182761	0.00034535	0.00188565		0.0268442	0.00166155	0.00572516	0.0119151			-3.61771	-6.4	-5.16288	-4.42994		Bartlett's statistic (corrected)	7.949
0.049457	0.00055517	0.00046009	0.0141525	0.00651385	0.00333951	0.00758329		0.0103443	0.0237149	0.00762395	0.0715918	0.00313662	0.00116676	0.00047771	0.00105129		0.049457	0.00651385	0.0103443	0.00313662			-3.00665	-5.03382	-4.57132	-5.76461		P value	0.0471
0.00042523	0.0612723	0.00120244	0.00642126	0.0112011	0.00435331	0.00324325		0.00551979	0.0069271	0.0339173	0.00019595	0.00920248	0.00030644	0.00028178	0.0271497		0.00042523	0.0112011	0.00551979	0.00920248			-7.76288	-4.49174	-5.19942	-4.68828		P value summary	*
0.000274449	0.0536602	0.00958827	0.00077257	0.00082479	0.00198773	0.00070855		0.00891282	0.00122181	0.0229377	0.000694154	0.00101779		0.0015218	0.000289166		0.000274449	0.00082479	0.00891282	0.00101779			-8.20075	-7.10038	-4.72026	-6.89012		Are SDs significantly different (P < 0.05)?	Yes
0.00173004	0.00135482	0.0220786	0.0204514	0.00023109				0.00363504	0.00332676	0.00125641	0.00262749	0.000315251		0.00098575	0.00456211		0.00173004	0.00023109	0.00363504	0.000315251			-6.35961	-8.3727	-5.61714	-8.06214
0.0014992	0.00057719	0.00152368	0.00220424	0.00080792				0.00379435	0.00836813	0.000695497	0.000740905	0.00381407		0.00099473	0.000903337		0.0014992	0.00080792	0.00379435	0.00381407			-6.50282	-7.12105	-5.57424	-5.56906		ANOVA table	SS	DF	MS	F (DFn, DFd)	P value
0.0125675	0.00127704	0.0648074	0.00396489	0.00554852				0.00011981	0.00447125	0.00118943	0.00174224	0.00664913		0.00210944	9.02967e-05		0.0125675	0.00554852	0.00011981	0.00664913			-4.37664	-5.19422	-9.0296	-5.01327		Treatment (between columns)	87.7	3	29.23	F (3, 456) = 13.77	P<0.0001
0.000566662	0.00158678	0.0150588	0.0317772	0.00124905				0.00685378	0.00184075	0.0425604	0.000456748	0.00725176		0.00199275	0.00298903		0.000566662	0.00124905	0.00685378	0.00725176			-7.47575	-6.68537	-4.98295	-4.92651		Residual (within columns)	968.3	456	2.123
0.0370212	0.0028696	0.0231165	0.0127556	0.00284033				0.00127245	0.00582601	0.00104465	0.00174224	0.000345184			0.00508733		0.0370212	0.00284033	0.00127245	0.000345184			-3.29626	-5.86384	-6.66681	-7.97143		Total	1056	459
0.00370768	0.00921316	0.00150261	0.0195149	0.00519769				0.00571871	0.127066	0.00120845	0.0128601	0.00239777			0.00248411		0.00370768	0.00519769	0.00571871	0.00239777			-5.59735	-5.25954	-5.16401	-6.03322
		0.0095493	0.0223573	0.00415158				0.0174649	0.00097465	0.00114235	0.562327	0.00153913			0.00531147		0.0147452	0.00415158	0.0174649	0.00153913			-4.21684	-5.48427	-4.04756	-6.47654		Data summary
		0.00233449	0.00197892	0.0012842				0.00526347	0.00477831	0.00103016	0.00179888	0.00280462			0.00311414		0.00038712	0.0012842	0.00526347	0.00280462			-7.85678	-6.65762	-5.24696	-5.87649		Number of treatments (columns)	4
		0.00751467	0.00492068	0.00368789				0.0164955	0.00107201	0.0004538	0.0155044	0.00560933			0.0262314		0.0067427	0.00368789	0.0164955	0.00560933			-4.99929	-5.6027	-4.10467	-5.18332		Number of values (total)	460
		0.0954195	0.00175963	0.0037214				0.00732524	0.00103378	0.000637667	0.0216593	0.000786168			0.00476628		0.00031338	0.0037214	0.00732524	0.000786168			-8.06809	-5.59366	-4.91643	-7.14834
		0.0040173	0.00493317	0.00020823				0.00460017	0.00015899	0.000270967	0.00232784	0.00108199			0.00987516		0.019806	0.00020823	0.00460017	0.00108199			-3.92177	-8.47687	-5.38166	-6.82896
		0.00825255	0.0687092	0.00244381				0.0290692	0.00490242	0.00116299	0.0261382	0.00741304			0.00310889		0.010425	0.00244381	0.0290692	0.00741304			-4.56355	-6.0142	-3.53808	-4.90452		Number of families	1
		0.00043205	0.0241702	0.00163384				0.00096204	0.00081105	0.000799396	0.00392063	0.00414288			0.00187678		0.00976917	0.00163384	0.00096204	0.00414288			-4.62852	-6.41682	-6.94645	-5.48636		Number of comparisons per family	6
		0.00468223	0.0118698	0.00167011				0.00240019	0.00111441	0.00380504	0.00553729	0.00030913			0.000202673		0.00027677	0.00167011	0.00240019	0.00030913			-8.19232	-6.39487	-6.03221	-8.08175		Alpha	0.05
		0.00540926	0.00566581	0.00518831				0.023872		0.000722623	0.00174657	0.0146041			0.000163915		0.00385702	0.00518831	0.023872	0.0146041			-5.55786	-5.26135	-3.73505	-4.22645
		0.0147606	0.0153407	0.00714722				0.020704		0.000844655	0.0014397	0.00734277			0.00578867		0.00130409	0.00714722	0.020704	0.00734277			-6.64225	-4.94103	-3.87743	-4.91404		Tukey's multiple comparisons test	Mean Diff.	95.00% CI of diff.	Below threshold?	Summary	Adjusted P Value
			0.0528786	0.00503289						0.00413079	0.000413094	0.00264333			0.00847988		0.00312801	0.00503289	0.00351278	0.00264333			-5.76736	-5.29176	-5.65135	-5.93572		YYpooled vs. YOpooled	0.792	0.2574 to 1.327	Yes	***	0.0009	A-B
			0.00566908							0.0111158		0.00106535					0.00534143	0.00637281	0.00575211	0.00106535			-5.23226	-5.05571	-5.15819	-6.84445		YYpooled vs. OYpooled	0.4141	-0.05394 to 0.8822	No	ns	0.1039	A-C
										0.000914949		0.00382253					0.0270434	0.00030791	0.00062692	0.00382253			-3.61031	-8.0857	-7.37469	-5.56684		YYpooled vs. OOpooled	1.172	0.6800 to 1.665	Yes	****	<0.0001	A-D
										0.00935666		0.00768207					0.00579108	0.00090734	0.00077461	0.00768207			-5.15144	-7.00499	-7.16315	-4.86887		YOpooled vs. OYpooled	-0.3779	-0.8931 to 0.1374	No	ns	0.2334	B-C
										0.00184514		0.00284289					0.00052339	0.00074981	0.0231669	0.00284289			-7.55518	-7.19569	-3.76503	-5.86294		YOpooled vs. OOpooled	0.3804	-0.1570 to 0.9179	No	ns	0.2628	B-D
										0.0176858		0.000202903					0.00055517	0.00251219	0.00399942	0.000202903			-7.49624	-5.9866	-5.52161	-8.50278		OYpooled vs. OOpooled	0.7583	0.2869 to 1.230	Yes	***	0.0002	C-D
										0.000515632		0.000633368					0.0612723	0.00076957	0.0044978	0.000633368			-2.79243	-7.16968	-5.40417	-7.36446
																	0.0536602	0.00390749	0.00225399	0.00153828			-2.92508	-5.54486	-6.09505	-6.47709		Test details	Mean 1	Mean 2	Mean Diff.	SE of diff.	n1	n2	q	DF
																	0.00135482	0.00135546	0.00085822	0.00022165			-6.60409	-6.60361	-7.06065	-8.41441		YYpooled vs. YOpooled	-5.321	-6.113	0.792	0.2073	118	85	5.403	456
																	0.00057719	0.00761451	0.0071569	0.0209047			-7.45734	-4.8777	-4.93968	-3.86778		YYpooled vs. OYpooled	-5.321	-5.735	0.4141	0.1815	118	142	3.226	456
																	0.00127704	0.00020716	0.00064075	0.00062385			-6.66321	-8.48202	-7.35287	-7.3796		YYpooled vs. OOpooled	-5.321	-6.494	1.172	0.1909	118	115	8.683	456
																	0.00158678	0.0002212	0.0203355	0.00534349			-6.44605	-8.41644	-3.89539	-5.23188		YOpooled vs. OYpooled	-6.113	-5.735	-0.3779	0.1998	85	142	2.674	456
																	0.0028696	0.00547202	0.00096756	0.0322343			-5.85358	-5.20811	-6.94073	-3.43472		YOpooled vs. OOpooled	-6.113	-6.494	0.3804	0.2084	85	115	2.581	456
																	0.00921316	0.00457918	0.0009464	0.00908648			-4.68712	-5.38624	-6.96285	-4.70097		OYpooled vs. OOpooled	-5.735	-6.494	0.7583	0.1828	142	115	5.866	456
																	0.0095026	0.00074326	0.0671777	0.00029923			-4.65619	-7.20446	-2.70041	-8.1143
																	0.00039378	0.00123741	0.0237149	0.0003986			-7.83972	-6.69473	-3.74165	-7.82755
																	0.0136932	0.00333951	0.0069271	0.00114422			-4.29086	-5.70193	-4.97231	-6.77303
																	0.0178733	0.00435331	0.00122181	0.00024478			-4.02445	-5.43682	-6.70742	-8.31515
																	0.0241702	0.00198773	0.00332676	0.0298999			-3.72263	-6.22076	-5.70576	-3.5099
																	0.00214005	0.00218845	0.00836813	0.00032348			-6.14693	-6.12456	-4.78332	-8.03637
																	0.0061738	0.00067195	0.00447125	0.00051563			-5.08744	-7.30533	-5.41009	-7.57012
																	0.00052384	0.0005886	0.00184075	0.00182761			-7.55432	-7.43776	-6.29758	-6.30475
																	0.00515036	0.00270239	0.00582601	0.00116676			-5.26869	-5.91362	-5.14542	-6.75352
																	0.00160036	0.00179888	0.127066	0.00030644			-6.43753	-6.32059	-2.06305	-8.09049
																	0.0131479	0.00054244	0.00097465	0.00132932			-4.33149	-7.51943	-6.93343	-6.62309
																	0.0197625	0.00384139	0.00477831	5.3322e-05			-3.92397	-5.56192	-5.34367	-9.83916
																	0.00153637	0.00079699	0.00107201	5.2646e-05			-6.47833	-7.13467	-6.83822	-9.85192
																	0.0211683	0.00395761	0.00103378	0.00417896			-3.85525	-5.53211	-6.87453	-5.47769
																	0.00024048	0.00157807	0.00015899	0.00025165			-8.33287	-6.45155	-8.74667	-8.28747
																	0.00046009	0.00368175	0.00490242	8.3403e-05			-7.68409	-5.60437	-5.31803	-9.39183
																	0.00120244	0.00560753	0.00081105	0.000147			-6.7234	-5.18364	-7.11718	-8.82508
																	0.00958827	0.00664158	0.00111441	0.00023368			-4.64721	-5.01441	-6.79943	-8.36156
																	0.0220786	0.0727163	0.000273287	0.00265986			-3.81315	-2.62119	-8.20499	-5.92948
																	0.00152368	0.0135668	0.00403926	0.00023036			-6.48663	-4.30013	-5.5117	-8.37587
																	0.0648074	0.00758329	0.000470401	0.00021616			-2.73634	-4.88181	-7.66193	-8.43949
																	0.0150588	0.00324325	0.000643838	0.00072467			-4.19579	-5.73118	-7.34806	-7.22979
																	0.0231165	0.00070855	0.00104284	0.0075656			-3.76721	-7.25229	-6.86581	-4.88414
																	0.00150261	0.00248391	4.75385e-05	0.00062058			-6.50055	-5.99792	-9.95397	-7.38486
																	0.0095493	0.00635297	0.000981752	0.00034535			-4.65129	-5.05883	-6.92617	-7.97095
																	0.00233449	0.00515867	0.00798957	0.00047771			-6.05996	-5.26708	-4.82962	-7.64651
																	0.00751467	0.00321531	0.001412	0.00028178			-4.8909	-5.73983	-6.56275	-8.17438
																	0.0954195	0.0105134	0.000589019	0.0015218			-2.34947	-4.55511	-7.43705	-6.48786
																	0.0040173	0.009602	0.00390887	0.00098575			-5.51715	-4.64578	-5.54451	-6.92211
																	0.00825255	0.00079958	0.00715001	0.00099473			-4.79723	-7.13142	-4.94064	-6.91304
																	0.00043205	0.00422194	0.0032549	0.00210944			-7.74697	-5.46746	-5.72759	-6.16133
																	0.00468223	0.0116773	0.0102722	0.00199275			-5.36398	-4.45011	-4.57831	-6.21824
																	0.00540926	0.00852905	0.00237948	0.00171947			-5.21964	-4.76428	-6.04087	-6.36574
																	0.0147606	0.0007546	0.00762395	0.000324304			-4.21579	-7.18932	-4.87646	-8.03383
																	0.0100442	0.0023767	0.0339173	0.00867854			-4.60076	-6.04204	-3.38383	-4.7469
																	0.00592297	0.00072835	0.0229377	0.000919017			-5.12892	-7.22473	-3.77497	-6.99221
																	0.0184669	0.00010312	0.00125641	0.00316677			-3.99178	-9.17962	-6.6795	-5.75504
																	0.00135583		0.000695497	0.000345518			-6.60334		-7.27088	-7.97047
																	0.00348694		0.00118943	0.000444286			-5.65873		-6.73428	-7.71904
																	0.00036981		0.0425604	9.02967e-05			-7.90252		-3.15683	-9.31241
																	0.0266413		0.00104465	0.000116409			-3.62529		-6.86407	-9.0584
																	0.00525213		0.00120845	0.000661975			-5.24912		-6.71842	-7.32028
																	0.00064816		0.00114235	0.000723987			-7.34137		-6.77467	-7.23074
																	0.0028876		0.00103016	0.0182931			-5.84733		-6.87804	-4.00123
																	0.00289283		0.0004538	0.00478443			-5.84552		-7.69785	-5.34239
																	0.0098468		0.000637667	0.00567931			-4.62061		-7.35769	-5.17093
																	0.00012566		0.000270967	0.00188565			-8.98193		-8.21351	-6.27348
																	0.0009542		0.00116299	0.00105129			-6.95464		-6.75676	-6.85773
																	0.0155098		0.000799396	0.0271497			-4.16628		-7.13165	-3.60639
																	0.0141525		0.00380504	0.000289166			-4.25787		-5.57143	-8.14851
																	0.00642126		0.000722623	0.00456211			-5.04814		-7.23262	-5.38997
																	0.00077257		0.000844655	0.000903337			-7.16579		-7.07658	-7.00941
																	0.0204514		0.00413079	9.02967e-05			-3.88971		-5.48929	-9.31241
																	0.00220424		0.0111158	0.00298903			-6.11737		-4.49939	-5.81281
																	0.00396489		0.000914949	0.00508733			-5.53028		-6.99664	-5.281
																	0.0317772		0.00935666	0.00248411			-3.44901		-4.67167	-5.99784
																	0.0127556		0.00184514	0.00531147			-4.36178		-6.2952	-5.23789
																	0.0195149		0.0176858	0.00311414			-3.93658		-4.03499	-5.7718
																	0.0223573		0.000515632	0.0262314			-3.8006		-7.57012	-3.6408
																	0.00197892		0.00396331	0.00476628			-6.2252		-5.53068	-5.34619
																	0.00492068		0.00386398	0.00987516			-5.31431		-5.55606	-4.61773
																	0.00175963		0.00427505	0.00310889			-6.34265		-5.45496	-5.77349
																	0.00493317		0.0156348	0.00187678			-5.31177		-4.15826	-6.2782
																	0.0687092		0.0130038	0.000202673			-2.67787		-4.34251	-8.50392
																	0.0241702		0.0117502	0.000163915			-3.72263		-4.44388	-8.71616
																	0.0118698		0.0011101	0.00578867			-4.43376		-6.8033	-5.15185
																	0.00566581		0.0132034	0.00847988			-5.17331		-4.32728	-4.77006
																	0.0153407		0.048399				-4.17724		-3.02828
																	0.0528786		0.00056313				-2.93976		-7.482
																	0.00566908		0.00369567				-5.17273		-5.60059
																			0.00355458						-5.63952
																			0.000869859						-7.04718
																			0.00172709						-6.36132
																			0.000695749						-7.27052
																			0.0715918						-2.63678
																			0.00019595						-8.53765
																			0.000694154						-7.27282
																			0.00262749						-5.94173
																			0.000740905						-7.20764
																			0.00174224						-6.35259
																			0.000456748						-7.69138
																			0.00174224						-6.35259
																			0.0128601						-4.35362
																			0.562327						-0.575672
																			0.00179888						-6.32059
																			0.0155044						-4.16663
																			0.0216593						-3.83232
																			0.00232784						-6.06282
																			0.0261382						-3.64436
																			0.00392063						-5.5415
																			0.00553729						-5.19625
																			0.00174657						-6.3501
																			0.0014397						-6.54332
																			0.000413094						-7.79184
