# Supplementary material for: Mesenchymal stromal cell aging impairs the self-organizing capacity of lung alveolar epithelial stem cells
Source: eLife. 2021 Sep 16;10:e68049. doi: 10.7554/eLife.68049 (PMC8445616; doi:10.7554/eLife.68049)
Supplement: Figure 2—source data 1. [file elife-68049-fig2-data1.xlsx]

## Sheet: Figure 2E
Cytokines	Young L-MSC						Aged L-MSC						P value (unpaired T-TEST)	Mean of Young L-MSC	Mean of Aged L-MSC	Difference	SE of difference	t ratio	df	q value
IL-6	25.7638	33.1346	61.3022	66.2667	65.0522	67.985	33.7987	34.5185	413.151	454.661	472.566	499.73	0.015421	53.25	318.1	-264.8	90.83	2.915	10	0.013629
MMP-9	24.2811	8.30335	0	13.4609	0	16.4801	25.4659	35.707	39.3766	76.4758	0.656437	40.214	0.037192	10.42	36.32	-25.9	10.78	2.402	10	0.023904
CCL12/MCP-5	180.541	171.452	127.359	115.089	94.6169	91.4202	297.902	292.654	511.185	526.137	511.831	518.657	8.4e-05	130.1	443.1	-313	49.3	6.348	10	0.000296
CCL11/Eotaxin	241.958	247.545	346.169	331.869	350.388	364.241	200.139	204.782	1232.47	1218.53	1237.47	1193.71	0.025211	313.7	881.2	-567.5	215.9	2.629	10	0.018037
WISP-1/CCN4	116.18	119.625	94.082	88.1159	64.5812	62.3362	217.469	211.32	175.565	175.98	258.562	249.562	3.4e-05	90.82	214.7	-123.9	17.49	7.084	10	0.000237
VEGF	85.557	87.5894	115.455	111.546	123.429	124.672	123.269	120.614	292.699	294.166	350.946	347.82	0.007374	108	254.9	-146.9	43.85	3.349	10	0.007448
Osteoprotegerin	59.5333	63.1025	76.0565	63.9545	41.4928	42.5807	83.9544	83.6517	97.469	108.196	112.272	117.183	0.000347	57.79	100.5	-42.67	8.047	5.302	10	0.000817
CXCL2/MIP-2	48.7441	43.6483	45.7412	43.2398	29.4423	30.0353	65.3584	67.6811	72.8802	73.8491	53.4857	51.1619	0.000975	40.14	64.07	-23.93	5.198	4.604	10	0.001723
Coagulation factor III	137.985	134.092	128.226	123.29	114.177	114.492	233.457	229.285	152.758	154.571	184.335	179.934	0.001654	125.4	189.1	-63.68	14.94	4.263	10	0.002339
CCL2/JE/MCP-1	327.724	320.736	253.929	242.351	239.542	240.941	303.572	295.328	450.058	436.832	428.254	432.186	0.005174	270.9	391	-120.2	33.75	3.561	10	0.006097
IL-11	48.6026	47.888	58.6328	52.6378	39.3376	38.9934	45.7874	39.1992	79.2186	76.6678	78.7159	77.3723	0.046971	47.68	66.16	-18.48	8.158	2.265	10	0.027674
IGFBP-1	10.2481	11.4752	27.2142	26.2229	21.9753	21.3705	10.4975	11.8325	9.69388	7.66619	15.2175	13.7094	0.025511	19.75	11.44	8.315	3.171	2.622	10	0.018037

## Sheet: Figure 2I
Proteins	Young L-MSC				Aged L-MSC				P value (unpaired T-Test)	Mean of Young L-MSC	Mean of Aged L-MSC	Difference	SE of difference	t ratio	df	q value
NDPK B	13.06	12.5	9.07	14.16	6.02	12	2.2	2.23	0.042092	12.2	5.613	6.585	2.558	2.574	6	0.117729
Gelsolin	87.95	69.44	56.87	54.96	20.07	21.82	17.63	20.07	0.00081	67.31	19.9	47.41	7.643	6.203	6	0.029435
LAMP2	0.87	2.78	2.47	0.83	0	0	0	0	0.015137	1.738	0	1.738	0.5164	3.365	6	0.103543
Peroxiredoxin	12.19	16.67	16.48	11.66	7.03	12	4.41	8.92	0.025707	14.25	8.09	6.16	2.09	2.947	6	0.103856
LDHA	14.8	20.83	13.19	6.66	11.04	7.64	4.41	3.35	0.075984	13.87	6.61	7.26	3.39	2.142	6	0.138163
ECM1	6.97	11.11	0	4.16	3.01	3.27	3.31	2.23	0.31058	5.56	2.955	2.605	2.353	1.107	6	0.352897
C1RA	5.23	4.17	4.95	7.49	3.01	0	3.31	2.23	0.018239	5.46	2.138	3.323	1.033	3.216	6	0.103543
G3P2	8.71	6.94	7.42	11.66	6.02	3.27	3.31	1.12	0.011401	8.683	3.43	5.253	1.46	3.597	6	0.103543
LTBP1	4.35	4.17	4.12	4.16	1	1.09	3.31	3.35	0.02279	4.2	2.188	2.013	0.6619	3.04	6	0.103579
SYTC	0.87	0	3.3	1.67	0	0	0	0	0.082675	1.46	0	1.46	0.7017	2.081	6	0.140472
Elastin	0.87	0	4.95	2.5	0	0	0	0	0.104441	2.08	0	2.08	1.088	1.912	6	0.158228
FKBP10	4.35	2.78	5.77	4.16	2.01	2.18	2.2	2.23	0.013821	4.265	2.155	2.11	0.6136	3.439	6	0.103543
Osteoglycin	5.23	0	10.72	9.99	2.01	3.27	4.41	2.23	0.216993	6.485	2.98	3.505	2.541	1.379	6	0.292217
Stromelysin-1	13.06	0	25.55	24.15	0	3.27	7.71	8.92	0.13861	15.69	4.975	10.72	6.276	1.707	6	0.201595
eEF1A	8.71	6.94	13.19	6.66	4.01	6.55	4.41	5.58	0.059888	8.875	5.138	3.738	1.615	2.315	6	0.136096
ENDO180	1.74	0	3.3	5	1	1.09	2.2	0	0.261497	2.51	1.073	1.438	1.16	1.239	6	0.327863
IBP	4.35	0	4.95	9.99	0	1.09	4.41	2.23	0.246762	4.823	1.933	2.89	2.252	1.283	6	0.320437
ADAM-TS2	1.74	0	3.3	5.83	1	2.18	1.1	1.12	0.322262	2.718	1.35	1.368	1.268	1.078	6	0.355075
MGP	11.32	0	9.89	12.49	4.01	4.36	7.71	11.15	0.64248	8.425	6.808	1.618	3.311	0.4886	6	0.648904
SDF-1	2.61	0	2.47	3.33	1	0	1.1	2.23	0.278974	2.103	1.083	1.02	0.8571	1.19	6	0.338116
14-3-3	3.48	0	3.3	3.33	1	1.09	0	2.23	0.181862	2.528	1.08	1.448	0.9588	1.51	6	0.254327
DKK3	4.35	0	3.3	3.33	3.01	1.09	2.2	1.12	0.430964	2.745	1.855	0.89	1.054	0.8441	6	0.460878
ME1	0	2.78	4.12	2.5	2.01	2.18	1.1	2.23	0.619885	2.35	1.88	0.47	0.8991	0.5227	6	0.643972
PLOD1	1.74	1.39	1.65	1.67	5.02	5.45	8.82	2.23	0.031789	1.613	5.38	-3.768	1.353	2.785	6	0.106239
Collagen XII	42.67	36.11	13.19	24.15	59.21	46.91	57.3	45.72	0.019934	29.03	52.29	-23.26	7.394	3.145	6	0.103543
ATP5A	0	0	0	0	1	0	3.31	2.23	0.063839	0	1.635	-1.635	0.7209	2.268	6	0.13654
Keratin 17	0.87	4.17	0	3.33	6.02	10.91	3.31	6.69	0.046639	2.093	6.733	-4.64	1.857	2.498	6	0.121128
Keratin 2	1.74	5.56	2.47	5	4.01	8.73	8.82	10.04	0.041398	3.693	7.9	-4.208	1.627	2.587	6	0.117729
ABCA8	1.74	1.39	2.47	2.5	2.01	6.55	4.41	3.35	0.084994	2.025	4.08	-2.055	0.9973	2.061	6	0.140472
Dnpep	0	1.39	2.47	2.5	3.01	4.36	3.31	4.46	0.019519	1.59	3.785	-2.195	0.6942	3.162	6	0.103543
ENO	10.45	8.33	22.25	22.48	23.08	25.09	25.35	23.42	0.070974	15.88	24.24	-8.358	3.814	2.191	6	0.138163
Integrin	0	0	0	0	5.02	4.36	1.1	0	0.075997	0	2.62	-2.62	1.223	2.141	6	0.138163
Legumain	3.48	0	1.65	2.5	7.03	7.64	2.2	0	0.292053	1.908	4.218	-2.31	2	1.155	6	0.342549
T-plastin	6.97	0	3.3	4.16	11.04	15.27	8.82	4.46	0.056682	3.608	9.898	-6.29	2.671	2.355	6	0.136096
BGAL	0	0	0	0	5.02	0	1.1	2.23	0.101011	0	2.088	-2.088	1.078	1.936	6	0.158228
PXDN	3.48	2.78	5.77	2.5	15.05	6.55	6.61	10.04	0.032141	3.633	9.563	-5.93	2.136	2.777	6	0.106239
