# Supplementary material for: Mesenchymal stromal cell aging impairs the self-organizing capacity of lung alveolar epithelial stem cells
Source: eLife. 2021 Sep 16;10:e68049. doi: 10.7554/eLife.68049 (PMC8445616; doi:10.7554/eLife.68049)
Supplement: Figure 3—figure supplement 1—source data 1. [file elife-68049-fig3-figsupp1-data1.xlsx]

## Sheet: Figure 3- figure supplement 1
	Young L-MSC								Aged L-MSC								P value (unpaired T-test)	Mean of Young L-MSC	Mean of Aged L-MSC	Difference	SE of difference	t ratio	df	q value
Basal	61	51	54	46	45	43	32	46	66	67	59	66	40	45	43	49	0.177708	47.25	54.38	-7.125	5.02	1.419	14	0.179485
Oligo-sensitive	59	47	43	36	56	55	53	50	67	55	58	50	55	46	57	58	0.112097	49.88	55.75	-5.875	3.465	1.695	14	0.150957
Non-glycolysis	21	17	15	12	22	24	20	19	31	25	24	21	26	23	34	26	0.002567	18.75	26.25	-7.5	2.049	3.661	14	0.010372
Maximal	136	110	111	95	117	111	101	106	151	137	138	131	116	109	136	129	0.007173	110.9	130.9	-20	6.361	3.144	14	0.01449
