# Supplementary material for: Mesenchymal stromal cell aging impairs the self-organizing capacity of lung alveolar epithelial stem cells
Source: eLife. 2021 Sep 16;10:e68049. doi: 10.7554/eLife.68049 (PMC8445616; doi:10.7554/eLife.68049)
Supplement: Figure 3—source data 1. [file elife-68049-fig3-data1.xlsx]

## Sheet: Figure 3A
Time (min)	Young L-MSC								Aged L-MSC								P value (unpired T-TEST)	Mean of Young L-MSC	Mean of Aged L-MSC	Difference	SE of difference	t ratio	df	q value
1	148	108	107.56	92	123	141	113	110	218	177	184	151	173	123	275	151	0.00313	117.9	181.5	-63.63	17.87	3.561	14	0.000989
10	143	105	103.852	91	121	135	108	105	215	171	179	148	165	117	263	145	0.003126	114	175.4	-61.38	17.23	3.562	14	0.000989
18	144	107	104.65	92	121	133	109	103	217	171	180	147	164	116	262	144	0.003427	114.3	175.1	-60.88	17.32	3.516	14	0.000989
27	144	109	105.952	92	121	134	109	103	220	172	181	147	164	114	263	144	0.003925	114.8	175.6	-60.88	17.66	3.447	14	0.000989
36	49	42	39.5164	41	44	53	37	42	75	59	66	55	61	47	96	52	0.003439	43.5	63.88	-20.38	5.799	3.514	14	0.000989
44	47	41	38.3846	40	41	49	35	39	70	55	60	51	56	44	87	48	0.004174	41.25	58.88	-17.63	5.159	3.416	14	0.000989
53	320	181	219.899	156	206	197	173	148	443	347	372	288	240	150	373	228	0.017404	200.1	305.1	-105	38.95	2.696	14	0.00293
61	342	206	237.429	169	209	221	178	158	498	400	396	316	260	180	407	260	0.010155	215	339.6	-124.6	41.97	2.969	14	0.001865
70	30	26	24.9708	27	30	35	25	28	45	32	42	34	42	31	58	33	0.005262	28.25	39.63	-11.38	3.447	3.3	14	0.001063
79	30	26	24.0489	26	27	33	23	26	47	35	41	33	38	30	54	31	0.002347	26.88	38.63	-11.75	3.17	3.707	14	0.000989
87	29	26	22.8211	24	25	30	20	24	45	34	38	31	34	26	50	28	0.004407	25.13	35.75	-10.63	3.135	3.389	14	0.000989
96	24	23	19.7326	22	22	27	18	22	40	30	34	28	31	24	45	25	0.002874	22.25	32.13	-9.875	2.74	3.604	14	0.000989

## Sheet: Figure 3B
Time (min)	Young L-MSC								Aged L-MSC								P value (unpired T-TEST)	Mean of Young L-MSC	Mean of Aged L-MSC	Difference	SE of difference	t ratio	df	q value
1	84	75	72	62	73	73	55	72	103	89	89	83	79	66	95	77	0.013561	70.75	85.13	-14.38	5.093	2.823	14	0.011206
10	82	71	70	59	66	69	51	68	98	91	84	85	69	65	81	73	0.017293	67	80.75	-13.75	5.095	2.699	14	0.0131
18	82	69	69	58	66	68	52	67	98	91	84	86	68	66	79	74	0.012415	66.38	80.75	-14.38	5.013	2.867	14	0.011206
27	82	67	69	58	67	67	52	66	96	91	83	86	66	67	77	75	0.012158	66	80.13	-14.13	4.908	2.878	14	0.011206
36	116	92	95	81	91	90	73	83	139	126	115	117	86	84	98	96	0.053083	90.13	107.6	-17.5	8.284	2.113	14	0.037117
44	141	114	112	94	123	121	105	115	163	147	141	137	121	114	133	133	0.013218	115.6	136.1	-20.5	7.229	2.836	14	0.011206
53	157	127	126	107	139	135	121	125	182	162	162	152	142	132	170	155	0.00274	129.6	157.1	-27.5	7.579	3.628	14	0.004981
61	156	127	126	107	138	137	121	127	172	156	155	149	144	135	171	156	0.002395	129.9	154.8	-24.88	6.73	3.696	14	0.004981
70	126	102	90	80	117	119	101	107	155	135	133	126	122	111	145	134	0.002051	105.3	132.6	-27.38	7.252	3.775	14	0.004981
78	122	103	88	81	115	121	102	109	154	133	131	122	125	111	153	131	0.002347	105.1	132.5	-27.38	7.386	3.706	14	0.004981
87	19	18	13	12	22	26	20	21	28	23	22	19	25	25	33	29	0.010814	18.88	25.5	-6.625	2.255	2.937	14	0.011206
96	21	18	15	13	24	26	21	21	31	25	24	21	28	25	35	28	0.005101	19.88	27.13	-7.25	2.187	3.316	14	0.007728
104	21	17	15	12	23	24	20	20	31	25	24	21	27	24	34	27	0.002379	19	26.63	-7.625	2.061	3.7	14	0.004981
113					22	24	20	19					26	23	34	26	0.060908	21.25	27.25	-6	2.606	2.302	6	0.039546

## Sheet: Figure 3 C-H
Figure 3C-Basal				Figure 3D-ATP-linked					Figure 3E- Proton leak					Figure 3F- Maximal					Figure 3G- Reserve Capacity
Young L-MSC	Aged L-MSC			Young L-MSC	Aged L-MSC				Young L-MSC	Aged L-MSC				Young L-MSC	Aged L-MSC				Young L-MSC	Aged L-MSC
96	129			80	107				16	22				181	206				85	77
103	89			85	71				19	18				167	125				64	36
89	213			74	176				15	37				153	323				64	110
79	116			64	96				15	20				124	200				45	84
116	175			98	150				18	25				314	453				198	278
83	138			68	116				15	21				180	366				97	228
83	144			68	122				16	22				215	358				131	214
68	116			52	96				16	19				145	285				77	169
t-Test: Two-Sample Assuming Equal Variances				t-Test: Two-Sample Assuming Equal Variances					t-Test: Two-Sample Assuming Equal Variances					t-Test: Two-Sample Assuming Equal Variances					t-Test: Two-Sample Assuming Equal Variances
	Variable 1	Variable 2			Variable 1	Variable 2				Variable 1	Variable 2				Variable 1	Variable 2				Variable 1	Variable 2
Mean	89.625	140		Mean	73.625	116.75			Mean	16.25	23			Mean	184.875	289.5			Mean	95.125	149.5
Variance	226.268	1492.57		Variance	198.268	1099.07			Variance	2.21429	36.5714			Variance	3464.41	11494.6			Variance	2393.55	7314.86
Observations	8	8		Observations	8	8			Observations	8	8			Observations	8	8			Observations	8	8
Pooled Variance	859.42			Pooled Variance	648.67				Pooled Variance	19.3929				Pooled Variance	7479.49				Pooled Variance	4854.21
Hypothesized Mean Difference	0			Hypothesized Mean Difference	0				Hypothesized Mean Difference	0				Hypothesized Mean Difference	0				Hypothesized Mean Difference	0
df	14			df	14				df	14				df	14				df	14
t Stat	-3.43671			t Stat	-3.38647				t Stat	-3.06558				t Stat	-2.41952				t Stat	-1.56088
P(T<=t) one-tail	0.00200462			P(T<=t) one-tail	0.00221527				P(T<=t) one-tail	0.0041932				P(T<=t) one-tail	0.0148675				P(T<=t) one-tail	0.0704333
t Critical one-tail	1.76131			t Critical one-tail	1.76131				t Critical one-tail	1.76131				t Critical one-tail	1.76131				t Critical one-tail	1.76131
P(T<=t) two-tail	0.00400924			P(T<=t) two-tail	0.00443054				P(T<=t) two-tail	0.0083864				P(T<=t) two-tail	0.0297351				P(T<=t) two-tail	0.140867
t Critical two-tail	2.14479			t Critical two-tail	2.14479				t Critical two-tail	2.14479				t Critical two-tail	2.14479				t Critical two-tail	2.14479
Figure 3H- Non-Mito
Young L-MSC	Aged L-MSC
25	34
30	26
20	50
24	28
29	45
26	34
23	38
24	31
t-Test: Two-Sample Assuming Equal Variances
	Variable 1	Variable 2
Mean	25.125	35.75
Variance	10.4107	68.2143
Observations	8	8
Pooled Variance	39.3125
Hypothesized Mean Difference	0
df	14
t Stat	-3.38917
P(T<=t) one-tail	0.0022034
t Critical one-tail	1.76131
P(T<=t) two-tail	0.0044068
t Critical two-tail	2.14479

## Sheet: Figure 3I
	ECAR	OCR
Young L-MSC	68	122
	52	110
	67	135
	66	104
	82	144
	69	106
	66	108
	58	92
Aged L-MSC	66	165
	77	264
	67	116
	75	145
	96	220
	83	181
	91	172
	86	147

## Sheet: Figure 3J
Young L-MSC	Aged L-MSC
1.38539	1.2637
1.55254	1.11105
2.12996	1.01272
1.92039	1.33676
1.82288	1.43991
t-Test: Two-Sample Assuming Equal Variances
	Variable 1	Variable 2
Mean	1.76223	1.23283
Variance	0.0874739	0.0294785
Observations	5	5
Pooled Variance	0.0584762
Hypothesized Mean Difference	0
df	8
t Stat	3.46154
P(T<=t) one-tail	0.00427421
t Critical one-tail	1.85955
P(T<=t) two-tail	0.00854842
t Critical two-tail	2.306
