# Supplementary material for: Mesenchymal stromal cell aging impairs the self-organizing capacity of lung alveolar epithelial stem cells
Source: eLife. 2021 Sep 16;10:e68049. doi: 10.7554/eLife.68049 (PMC8445616; doi:10.7554/eLife.68049)
Supplement: Figure 4—figure supplement 1—source data 1. [file elife-68049-fig4-figsupp1-data1.xlsx]

## Sheet: Fig.4-figure supplement 1B
YY-Control	YY+H2O2		Y = Young
329	422
392	352
300	300
300	413

## Sheet: Fig.4-figure supplement 1C
Young AEC2:Young L-MSC-Con				Young AEC2:Young L-MSC-H2O2				Transform	Young AEC2:Young L-MSC-Con				Young AEC2:Young L-MSC-H2O2					Table Analyzed	Transform of YY-conVsYY-H2O2-200 µm cut-off
0.0416523	0.663518	0.117316	0.164629	0.062673	0.122069	0.0312571	0.908219	Y=Ln (Y)	-3.1784	-0.410199	-2.14288	-1.80406	-2.76982	-2.10316	-3.46551	-0.0962696
0.0336855	0.112792	0.0971379	0.0722703	0.0537558	0.0559475	0.0291878	0.0492288		-3.39069	-2.18221	-2.33162	-2.62734	-2.9233	-2.88334	-3.53401	-3.01128		Column B	YY+H2O2
0.0289561	0.102921	0.0905058	0.0624403	0.0412117	0.0556389	0.0235733	0.0404282		-3.54198	-2.2738	-2.40234	-2.77355	-3.18903	-2.88887	-3.74764	-3.20823		vs.	vs.
0.0279258	0.102321	0.0788485	0.0609519	0.0407822	0.0346367	0.0221042	0.0351215		-3.5782	-2.27964	-2.54023	-2.79767	-3.19951	-3.36284	-3.81199	-3.34894		Column A	YY-Control
0.024934	0.0801256	0.0705145	0.0583686	0.0372811	0.0334113	0.0203141	0.0248807		-3.69152	-2.52416	-2.65194	-2.84098	-3.28927	-3.39886	-3.89644	-3.69366
0.0237944	0.0621435	0.0654587	0.048117	0.0366224	0.0322885	0.0186683	0.0233533		-3.73831	-2.77831	-2.72634	-3.03412	-3.30709	-3.43305	-3.98093	-3.75702		Unpaired t test
0.0236574	0.0614737	0.0643358	0.0474407	0.0302619	0.0314392	0.0173419	0.0200464		-3.74408	-2.78915	-2.74364	-3.04827	-3.49787	-3.4597	-4.05463	-3.90971		P value	0.0225
0.0232652	0.0590644	0.0606987	0.0379593	0.0291716	0.0244883	0.0158518	0.0174589		-3.76079	-2.82913	-2.80183	-3.27124	-3.53456	-3.70956	-4.14447	-4.0479		P value summary	*
0.0222078	0.050161	0.0507553	0.0334895	0.0286436	0.0240549	0.015788	0.0160305		-3.80731	-2.99252	-2.98074	-3.39652	-3.55283	-3.72742	-4.1485	-4.13326		Significantly different (P < 0.05)?	Yes
0.0191252	0.0483058	0.050524	0.0316415	0.0285589	0.0196953	0.0155582	0.0138751		-3.95675	-3.0302	-2.98531	-3.45329	-3.55579	-3.92738	-4.16317	-4.27766		One- or two-tailed P value?	Two-tailed
0.017534	0.0444704	0.050048	0.0292587	0.0220694	0.0188503	0.0153149	0.0125966		-4.04361	-3.11293	-2.99477	-3.53158	-3.81356	-3.97122	-4.17893	-4.37433		t, df	t=2.296, df=235
0.0171179	0.0414015	0.0430703	0.0250159	0.0198722	0.0170407	0.0152228	0.0124494		-4.06763	-3.18444	-3.14492	-3.68824	-3.91843	-4.07215	-4.18496	-4.38608
0.0168067	0.0387261	0.0384316	0.0240582	0.0189422	0.0150345	0.0144213	0.011817		-4.08598	-3.25124	-3.25888	-3.72728	-3.96636	-4.19741	-4.23905	-4.43822		How big is the difference?
0.0151517	0.0369605	0.0371008	0.0232641	0.016858	0.0122459	0.0142978	0.0102053		-4.18964	-3.29791	-3.29412	-3.76084	-4.08293	-4.40256	-4.24765	-4.58485		Mean of column A	-4.683
0.0147458	0.0299102	0.031856	0.0232361	0.0163987	0.0114334	0.0139671	0.00943362		-4.2168	-3.50956	-3.44653	-3.76205	-4.11055	-4.47121	-4.27105	-4.66348		Mean of column B	-4.883
0.0146923	0.0297941	0.0308885	0.0225177	0.0157301	0.0110847	0.0139671	0.00883758		-4.22043	-3.51344	-3.47737	-3.79345	-4.15218	-4.50219	-4.27105	-4.72874		Difference between means (B - A) ± SEM	-0.1997 ± 0.08698
0.0141366	0.0291128	0.0294107	0.0218781	0.0147254	0.0109488	0.0139153	0.00861336		-4.25899	-3.53658	-3.5264	-3.82227	-4.21818	-4.51452	-4.27476	-4.75444		95% confidence interval	-0.3711 to -0.02838
0.0130096	0.0289252	0.0288455	0.0216317	0.0140759	0.0107743	0.0139153	0.00793657		-4.34207	-3.54304	-3.5458	-3.8336	-4.26329	-4.53059	-4.27476	-4.83627		R squared (eta squared)	0.02195
0.0122605	0.0263529	0.0281829	0.0190407	0.0138568	0.0103938	0.0135271	0.00770076		-4.40138	-3.63618	-3.56904	-3.96118	-4.27898	-4.56655	-4.30306	-4.86644
0.0118688	0.0254439	0.0276316	0.0176388	0.0134457	0.0103766	0.0130319	0.00757986		-4.43384	-3.67128	-3.58879	-4.03765	-4.3091	-4.5682	-4.34035	-4.88226		F test to compare variances
0.0117468	0.025224	0.0264819	0.0166024	0.0131272	0.0102309	0.0127936	0.00749444		-4.44418	-3.67996	-3.63129	-4.09821	-4.33307	-4.58234	-4.35881	-4.89359		F, DFn, Dfd	1.407, 134, 101
0.0116296	0.0247232	0.026168	0.0163279	0.0130945	0.0101455	0.012204	0.00733228		-4.4542	-3.70001	-3.64322	-4.11488	-4.33556	-4.59073	-4.40599	-4.91547		P value	0.0719
0.0106454	0.024374	0.0258958	0.016293	0.0122326	0.00986959	0.0120424	0.00711029		-4.54262	-3.71424	-3.65367	-4.11702	-4.40365	-4.6183	-4.41932	-4.94621		P value summary	ns
0.0105408	0.0241231	0.0253543	0.0158721	0.0120599	0.00946678	0.0119217	0.00680036		-4.5525	-3.72458	-3.67481	-4.14319	-4.41787	-4.65997	-4.42939	-4.99078		Significantly different (P < 0.05)?	No
0.0104452	0.0241117	0.0241866	0.0146269	0.0118609	0.00895483	0.0118816	0.00633318		-4.56162	-3.72506	-3.72196	-4.22489	-4.43451	-4.71556	-4.43277	-5.06195
0.0103931	0.0239469	0.0241019	0.0142542	0.0115914	0.0087146	0.0115973	0.00631853		-4.56661	-3.73192	-3.72547	-4.2507	-4.45749	-4.74276	-4.45698	-5.06427		Data analyzed
0.0103412	0.0236636	0.022203	0.0138377	0.0114886	0.00856103	0.0106036	0.00615814		-4.57162	-3.74382	-3.80753	-4.28036	-4.4664	-4.76054	-4.54656	-5.08998		Sample size, column A	135
0.0094798	0.0235675	0.0211677	0.0120376	0.0113683	0.00856103	0.010565	0.00608931		-4.65859	-3.74788	-3.85528	-4.41972	-4.47693	-4.76054	-4.55021	-5.10122		Sample size, column B	102
0.00913318	0.0233251	0.0195143	0.0114844	0.0110585	0.00853686	0.0101645	0.00604957		-4.69584	-3.75822	-3.93661	-4.46676	-4.50456	-4.76336	-4.58885	-5.10777
0.00903376	0.0228093	0.0189802	0.0106667	0.0108783	0.00849664	0.00991163	0.00596678		-4.70679	-3.78059	-3.96436	-4.54062	-4.52098	-4.76808	-4.61405	-5.12155
0.00870498	0.0218278	0.0189593	0.010602	0.0107428	0.00830844	0.009499	0.00595242		-4.74386	-3.82457	-3.96546	-4.54671	-4.53352	-4.79048	-4.65657	-5.12396
0.00796439	0.0214709	0.0187669	0.0102634	0.0102535	0.00804654	0.00938748	0.00571714		-4.83277	-3.84105	-3.97566	-4.57917	-4.58013	-4.82251	-4.66838	-5.16429
0.00786942	0.0196953	0.0186631	0.00993687	0.0100309	0.00792056	0.00924358	0.00570299		-4.84477	-3.92738	-3.98121	-4.6115	-4.60208	-4.83829	-4.68383	-5.16677
0.0076963	0.0191763	0.0182037	0.00921621	0.00988203	0.00778354	0.00913307	0.00569945		-4.86702	-3.95408	-4.00613	-4.68679	-4.61704	-4.85574	-4.69585	-5.16739
0.00737324	0.0187456	0.0174482	0.00892573	0.00964113	0.00755824	0.00850734	0.00553752		-4.9099	-3.9768	-4.04852	-4.71882	-4.64172	-4.88512	-4.76683	-5.19621
0.00729609	0.0178632	0.0174026	0.00890539	0.00940222	0.00735813	0.00849936	0.00539451		-4.92042	-4.02501	-4.05113	-4.7211	-4.66681	-4.91195	-4.76776	-5.22237
0.00728454	0.0171879	0.0173976	0.00859813	0.00938136	0.0073543	0.00846349	0.00519777		-4.922	-4.06355	-4.05142	-4.75621	-4.66903	-4.91247	-4.77199	-5.25953
0.00727299	0.0171624	0.0170343	0.00857002	0.00920259	0.00707268	0.00843564	0.00507137		-4.92359	-4.06503	-4.07253	-4.75949	-4.68827	-4.95152	-4.77529	-5.28414
0.00707769	0.0165614	0.0159107	0.00841392	0.0091736	0.00705379	0.0083562	0.00494602		-4.95081	-4.10068	-4.14076	-4.77787	-4.69143	-4.95419	-4.78475	-5.30917
0.00707007	0.016042	0.0156803	0.00833027	0.00899617	0.00700474	0.00832846	0.00466865		-4.95188	-4.13254	-4.15535	-4.78786	-4.71096	-4.96117	-4.78808	-5.36689
0.00704722	0.0155233	0.0153052	0.0081796	0.00884442	0.0069859	0.00824937	0.00465542		-4.95512	-4.16542	-4.17956	-4.80611	-4.72797	-4.96386	-4.79762	-5.36972
0.00701679	0.0146521	0.0152083	0.00804951	0.00864073	0.00695956	0.00783053	0.00445845		-4.95945	-4.22317	-4.18591	-4.82214	-4.75127	-4.96764	-4.84973	-5.41295
0.00700919	0.0144549	0.0151164	0.00798668	0.00861234	0.00691824	0.00768739	0.00444868		-4.96053	-4.23672	-4.19198	-4.82998	-4.75456	-4.97359	-4.86817	-5.41515
0.0069409	0.014383	0.0149091	0.00788885	0.00845071	0.00690698	0.00761039	0.00444868		-4.97032	-4.24171	-4.20578	-4.84231	-4.7735	-4.97522	-4.87824	-5.41515
0.0067374	0.0141204	0.0149043	0.00770988	0.00811463	0.00686576	0.00758734	0.0044129		-5.00008	-4.26014	-4.20611	-4.86525	-4.81409	-4.98121	-4.88127	-5.42322
0.00655077	0.0139683	0.0141321	0.00729513	0.00809874	0.00676866	0.00747626	0.00437722		-5.02817	-4.27096	-4.25931	-4.92055	-4.81605	-4.99545	-4.89602	-5.43134
0.00648772	0.0139636	0.0139624	0.00727611	0.00809477	0.0061164	0.00733913	0.00424188		-5.03784	-4.2713	-4.27139	-4.92316	-4.81654	-5.09678	-4.91453	-5.46275
0.0063659	0.0136282	0.0139294	0.00692171	0.00784198	0.006102	0.0072671	0.00422907		-5.0568	-4.29562	-4.27375	-4.97309	-4.84826	-5.09914	-4.9244	-5.46577
0.00627413	0.0124873	0.0138543	0.00680242	0.00780665	0.00596931	0.00712374	0.00419708		-5.07132	-4.38304	-4.27916	-4.99048	-4.85278	-5.12112	-4.94432	-5.47337
0.00609555	0.0122006	0.0133227	0.00672451	0.007623	0.00589444	0.00694031			-5.1002	-4.40627	-4.31829	-5.002	-4.87659	-5.13375	-4.97041
0.00601594	0.0120919	0.0125975	0.00668012	0.00706948	0.00579863	0.00689563			-5.11334	-4.41522	-4.37425	-5.00862	-4.95197	-5.15013	-4.97687
0.00596545	0.0120557	0.012543	0.00667273	0.00685426	0.00552134	0.00683991			-5.12177	-4.41821	-4.37859	-5.00973	-4.98289	-5.19913	-4.98498
0.00580058	0.0120512	0.0124116	0.00655122	0.00684299	0.0055109	0.0068325			-5.1498	-4.41859	-4.38913	-5.0281	-4.98453	-5.20103	-4.98607
0.0057436	0.0113271	0.0123709	0.00650722	0.0067344	0.00541723	0.00662591			-5.15967	-4.48056	-4.39241	-5.03484	-5.00053	-5.21817	-5.01677
0.00553158	0.0112476	0.0123257	0.00632132	0.00667102	0.00540686	0.00661857			-5.19728	-4.4876	-4.39607	-5.06383	-5.00998	-5.22009	-5.01788
0.00542309	0.0112343	0.0113286	0.00614801	0.00662268	0.00538613	0.0066039			-5.21709	-4.48878	-4.48043	-5.09163	-5.01726	-5.22393	-5.0201
0.00540217	0.0112123	0.0108796	0.00610135	0.00653006	0.00538613	0.00654898			-5.22095	-4.49074	-4.52087	-5.09925	-5.03134	-5.22393	-5.02845
0.00537085	0.0111815	0.0108709	0.00607627	0.00646364	0.00535164	0.00649422			-5.22677	-4.4935	-4.52167	-5.10336	-5.04156	-5.23035	-5.03684
0.00531185	0.010783	0.0107629	0.00605838	0.00645995	0.00533786	0.00635256			-5.23782	-4.52978	-4.53165	-5.10631	-5.04213	-5.23293	-5.0589
0.00518419	0.0107265	0.0103769	0.00601908	0.00640479	0.00531722	0.00618681			-5.26214	-4.53504	-4.56817	-5.11282	-5.05071	-5.2368	-5.08534
0.00516702	0.0107135	0.00947004	0.00566227	0.00639377	0.00529317	0.00602253			-5.26546	-4.53625	-4.65962	-5.17393	-5.05243	-5.24134	-5.11225
0.00512246	0.0105705	0.00941635	0.00563083	0.00633514	0.00517689	0.00602253			-5.27412	-4.54969	-4.66531	-5.1795	-5.06164	-5.26355	-5.11225
0.00509169	0.0104842	0.00938336	0.00562734	0.0063132	0.00517008	0.00588441			-5.28015	-4.55789	-4.66882	-5.18012	-5.06511	-5.26487	-5.13545
0.00492861	0.0104282	0.00905557	0.00549527	0.0062366	0.00514966	0.00580346			-5.3127	-4.56324	-4.70437	-5.20387	-5.07732	-5.26882	-5.1493
0.00481418	0.0103766	0.00886482	0.00538142	0.0062366	0.00513606	0.00572987			-5.33619	-4.5682	-4.72566	-5.2248	-5.07732	-5.27147	-5.16206
0.00481083	0.0099415	0.00871561	0.00532308	0.00616394	0.00509194	0.00562529			-5.33689	-4.61104	-4.74264	-5.2357	-5.08904	-5.2801	-5.18048
0.0047573	0.00979785	0.00861927	0.00523427	0.00611325	0.00508517	0.00559405			-5.34807	-4.62559	-4.75375	-5.25253	-5.0973	-5.28143	-5.18605
0.00473728	0.00975994	0.00856724	0.00517308	0.00603027	0.0050412	0.00553864			-5.35229	-4.62947	-4.75981	-5.26429	-5.11096	-5.29011	-5.19601
0.00465416	0.00954605	0.00851931	0.00512227	0.00601588	0.0050277	0.00544899			-5.36999	-4.65163	-4.76542	-5.27416	-5.11335	-5.29279	-5.21232
0.00455507	0.00936695	0.00837207	0.00508511	0.00594767	0.00500073	0.00532567			-5.39151	-4.67057	-4.78285	-5.28144	-5.12476	-5.29817	-5.23522
0.00446323	0.00922614	0.00834431	0.00506825	0.00592977	0.00498053	0.00519991			-5.41188	-4.68571	-4.78618	-5.28476	-5.12777	-5.30222	-5.25911
0.00445342	0.00916836	0.00824147	0.00499765	0.00587973	0.00497717	0.00514922			-5.41408	-4.692	-4.79858	-5.29879	-5.13624	-5.30289	-5.26891
0.00435579	0.00916012	0.00801361	0.0049374	0.00577653	0.00483326	0.00511551			-5.43625	-4.6929	-4.82661	-5.31092	-5.15395	-5.33223	-5.27548
0.00427497	0.00912717	0.00798235	0.00489737	0.00574462	0.0048133	0.0050718			-5.45498	-4.6965	-4.83052	-5.31906	-5.15949	-5.33637	-5.28406
0.00423636	0.0090696	0.00785382	0.0048907	0.00557546	0.0046217	0.00499478			-5.46405	-4.70283	-4.84676	-5.32042	-5.18938	-5.37699	-5.29936
0.00423315	0.0088487	0.00783053	0.00484416	0.005495	0.00458566	0.00491483			-5.46481	-4.72748	-4.84973	-5.32998	-5.20392	-5.38482	-5.3155
	0.00883241	0.00767968	0.00483752	0.00539758	0.00458566	0.00484853				-4.72933	-4.86918	-5.33135	-5.2218	-5.38482	-5.32908
	0.00869029	0.00746862	0.00482094	0.00539411	0.0045334	0.0048122				-4.74555	-4.89705	-5.33479	-5.22245	-5.39628	-5.3366
	0.008557	0.00736953	0.00475151	0.00538371	0.0043875	0.00474965				-4.76101	-4.9104	-5.34929	-5.22438	-5.429	-5.34968
	0.00813749	0.00735813	0.00474162	0.00536986	0.00433922	0.00468084				-4.81127	-4.91195	-5.35138	-5.22695	-5.44006	-5.36428
	0.00801892	0.0072255	0.00473503	0.00521135	0.00430714	0.00463189				-4.82595	-4.93014	-5.35277	-5.25692	-5.44748	-5.37479
	0.00796379	0.00713127	0.00456476	0.00517368	0.00419546	0.00457987				-4.83285	-4.94327	-5.38939	-5.26417	-5.47375	-5.38608
	0.00796379	0.00712751	0.00445134	0.00504087		0.00452159				-4.83285	-4.94379	-5.41455	-5.29018		-5.39889
	0.00793627	0.00697761	0.00434527	0.00502393		0.00447965				-4.83631	-4.96505	-5.43867	-5.29354		-5.40821
	0.00792842	0.00686961	0.00431329	0.00501038		0.00439936				-4.8373	-4.98065	-5.44605	-5.29624		-5.4263
	0.00781088	0.00680285	0.00430371	0.00488235		0.00438976				-4.85224	-4.99041	-5.44828	-5.32213		-5.42848
	0.00759693	0.00670681	0.00424005	0.00484549		0.00433229				-4.88001	-5.00463	-5.46318	-5.32971		-5.44166
	0.00745027	0.00658557	0.00420517	0.00481207		0.00428777				-4.89951	-5.02287	-5.47144	-5.33663		-5.45199
	0.00745027	0.00651611		0.00473216		0.00428142				-4.89951	-5.03348		-5.35337		-5.45347
	0.00722065	0.0064578		0.00466592		0.00419604				-4.93081	-5.04247		-5.36747		-5.47361
	0.00720923	0.0062659		0.00463951						-4.93239	-5.07263		-5.37315
	0.00712189	0.0062515		0.00460985						-4.94458	-5.07493		-5.37956
	0.00707646	0.00592326		0.00446906						-4.95098	-5.12887		-5.41058
	0.00707268	0.00568448		0.00442354						-4.95152	-5.17002		-5.42082
	0.00703113	0.00559752		0.0043717						-4.95741	-5.18543		-5.4326
	0.00700097	0.00550065		0.004362						-4.96171	-5.20289		-5.43482
	0.00685079	0.00549031		0.00434908						-4.98339	-5.20477		-5.43779
	0.00656846	0.00539749		0.00432006						-5.02548	-5.22182		-5.44449
	0.0065574	0.00537352		0.00428468						-5.02716	-5.22627		-5.45271
	0.00645811	0.00532226		0.00427505						-5.04242	-5.23586		-5.45496
	0.00642879	0.00522363		0.00420145						-5.04697	-5.25456		-5.47233
	0.00621392	0.00522024		0.00419188						-5.08096	-5.25521		-5.47461
	0.00613442	0.005183								-5.09384	-5.26237
	0.00613442	0.00507516								-5.09384	-5.2834
	0.0061056	0.00498476								-5.09855	-5.30137
	0.00599792	0.00492147								-5.11634	-5.31415
	0.00591936	0.00472668								-5.12953	-5.35453
	0.0059158	0.0047234								-5.13013	-5.35523
	0.0058731	0.00451836								-5.13737	-5.39961
	0.00586955	0.00450544								-5.13798	-5.40247
	0.00579863	0.00449254								-5.15013	-5.40534
	0.00562961	0.00439936								-5.17972	-5.4263
	0.0055283	0.00438016								-5.19787	-5.43067
	0.00538958	0.00438016								-5.22329	-5.43067
	0.00538613	0.00434823								-5.22393	-5.43799
	0.00523493	0.00432592								-5.2524	-5.44313
	0.00522125	0.00431001								-5.25502	-5.44681
	0.00521783	0.00421181								-5.25567	-5.46986
	0.00521783									-5.25567
	0.00516667									-5.26553
	0.00514286									-5.27015
	0.00494693									-5.30899
	0.00490337									-5.31783
	0.00488664									-5.32125
	0.00484659									-5.32948
	0.0048133									-5.33637
	0.00475025									-5.34956
	0.00472709									-5.35445
	0.00456277									-5.38982
	0.00452688									-5.39772
	0.0043875									-5.429
	0.00435851									-5.43562
	0.00434565									-5.43858
	0.00432317									-5.44377
	0.00420817									-5.47073

## Sheet: Fig. 4- figure supplement 1 D-G
Figure Supplement 4D	Aged L-MSC			ANOVA summary							Tukey's multiple comparisons test	Mean Diff.	95.00% CI of diff.	Below threshold?	Summary	Adjusted P Value
Young L-MSC	WT	NOX4-/+		F	5.303						Young L-MSC vs. Aged L-MSC	0.09757	-0.02103 to 0.2162	No	ns	0.099	A-B
0.1926	0.1149	0.2523		P value	0.0472						Young L-MSC vs. Aged L-MSC Nox4-/+	-0.0201	-0.1387 to 0.09849	No	ns	0.8647	A-C
0.2951	0.2169	0.2809		P value summary	*						Aged L-MSC vs. Aged L-MSC Nox4-/+	-0.1177	-0.2363 to 0.0009263	No	ns	0.0515	B-C
0.2414	0.1046	0.2562		Significant diff. among means (P < 0.05)?	Yes
				R squared	0.6387						Test details	Mean 1	Mean 2	Mean Diff.	SE of diff.	n1	n2	q	DF
											Young L-MSC vs. Aged L-MSC	0.243	0.1455	0.09757	0.03865	3	3	3.57	6
				Brown-Forsythe test							Young L-MSC vs. Aged L-MSC Nox4-/+	0.243	0.2631	-0.0201	0.03865	3	3	0.7354	6
				F (DFn, DFd)	0.4972 (2, 6)						Aged L-MSC vs. Aged L-MSC Nox4-/+	0.1455	0.2631	-0.1177	0.03865	3	3	4.305	6
				P value	0.6312
				P value summary	ns
				Are SDs significantly different (P < 0.05)?	No
				Bartlett's test
				Bartlett's statistic (corrected)
				P value
				P value summary
				Are SDs significantly different (P < 0.05)?
				ANOVA table	SS	DF	MS	F (DFn, DFd)	P value
				Treatment (between columns)	0.02377	2	0.01188	F (2, 6) = 5.303	P=0.0472
				Residual (within columns)	0.01345	6	0.002241
				Total	0.03721	8
				Data summary
				Number of treatments (columns)	3
				Number of values (total)	9
Figure Supplement 4E	Aged L-MSC			ANOVA summary							Tukey's multiple comparisons test	Mean Diff.	95.00% CI of diff.	Below threshold?	Summary	Adjusted P Value
Young L-MSC	WT	NOX4-/+		F	4.317						Young L-MSC vs. Aged L-MSC	-0.335	-5.579 to 4.909	No	ns	0.9791	A-B
6.365	7.878	12.71		P value	0.0689						Young L-MSC vs. Aged L-MSC Nox4-/+	-4.507	-9.751 to 0.7370	No	ns	0.0858	A-C
7.344	7.216	10.63		P value summary	ns						Aged L-MSC vs. Aged L-MSC Nox4-/+	-4.172	-9.416 to 1.072	No	ns	0.11	B-C
10.91	10.53	14.8		Significant diff. among means (P < 0.05)?	No
				R squared	0.59						Test details	Mean 1	Mean 2	Mean Diff.	SE of diff.	n1	n2	q	DF
											Young L-MSC vs. Aged L-MSC	8.206	8.541	-0.335	1.709	3	3	0.2772	6
				Brown-Forsythe test							Young L-MSC vs. Aged L-MSC Nox4-/+	8.206	12.71	-4.507	1.709	3	3	3.729	6
				F (DFn, DFd)	0.05899 (2, 6)						Aged L-MSC vs. Aged L-MSC Nox4-/+	8.541	12.71	-4.172	1.709	3	3	3.452	6
				P value	0.9433
				P value summary	ns
				Are SDs significantly different (P < 0.05)?	No
				Bartlett's test
				Bartlett's statistic (corrected)
				P value
				P value summary
				Are SDs significantly different (P < 0.05)?
				ANOVA table	SS	DF	MS	F (DFn, DFd)	P value
				Treatment (between columns)	37.83	2	18.92	F (2, 6) = 4.317	P=0.0689
				Residual (within columns)	26.29	6	4.382
				Total	64.12	8
				Data summary
				Number of treatments (columns)	3
				Number of values (total)	9
Figure Supplement 4F	Aged L-MSC			ANOVA summary
Young L-MSC	WT	NOX4-/+		F	3.486						Tukey's multiple comparisons test	Mean Diff.	95.00% CI of diff.	Below threshold?	Summary	Adjusted P Value
1.144	1.231	0.7748		P value	0.0989						Young L-MSC vs. Aged L-MSC	0.34	-0.2266 to 0.9067	No	ns	0.2354	A-B
1.063	0.5771	0.686		P value summary	ns						Young L-MSC vs. Aged L-MSC Nox4-/+	0.4727	-0.09392 to 1.039	No	ns	0.0946	A-C
1.236	0.6148	0.5641		Significant diff. among means (P < 0.05)?	No						Aged L-MSC vs. Aged L-MSC Nox4-/+	0.1327	-0.4340 to 0.6993	No	ns	0.7622	B-C
				R squared	0.5375
											Test details	Mean 1	Mean 2	Mean Diff.	SE of diff.	n1	n2	q	DF
				Brown-Forsythe test							Young L-MSC vs. Aged L-MSC	1.148	0.8076	0.34	0.1847	3	3	2.604	6
				F (DFn, DFd)	0.5685 (2, 6)						Young L-MSC vs. Aged L-MSC Nox4-/+	1.148	0.675	0.4727	0.1847	3	3	3.62	6
				P value	0.5941						Aged L-MSC vs. Aged L-MSC Nox4-/+	0.8076	0.675	0.1327	0.1847	3	3	1.016	6
				P value summary	ns
				Are SDs significantly different (P < 0.05)?	No
				Bartlett's test
				Bartlett's statistic (corrected)
				P value
				P value summary
				Are SDs significantly different (P < 0.05)?
				ANOVA table	SS	DF	MS	F (DFn, DFd)	P value
				Treatment (between columns)	0.3567	2	0.1783	F (2, 6) = 3.486	P=0.0989
				Residual (within columns)	0.3069	6	0.05116
				Total	0.6636	8
				Data summary
				Number of treatments (columns)	3
				Number of values (total)	9
Figure Supplement 4G	Aged L-MSC			ANOVA summary							Tukey's multiple comparisons test	Mean Diff.	95.00% CI of diff.	Below threshold?	Summary	Adjusted P Value
Young L-MSC	WT	NOX4-/+		F	1.787						Young L-MSC vs. Aged L-MSC	-1.109	-3.904 to 1.686	No	ns	0.4865	A-B
2.338	4.491	5.453		P value	0.2461						Young L-MSC vs. Aged L-MSC Nox4-/+	-1.696	-4.491 to 1.099	No	ns	0.2296	A-C
3.366	4.75	4.012		P value summary	ns						Aged L-MSC vs. Aged L-MSC Nox4-/+	-0.5867	-3.382 to 2.208	No	ns	0.8024	B-C
5.193	4.983	6.519		Significant diff. among means (P < 0.05)?	No
				R squared	0.3733						Test details	Mean 1	Mean 2	Mean Diff.	SE of diff.	n1	n2	q	DF
											Young L-MSC vs. Aged L-MSC	3.632	4.741	-1.109	0.911	3	3	1.722	6
				Brown-Forsythe test							Young L-MSC vs. Aged L-MSC Nox4-/+	3.632	5.328	-1.696	0.911	3	3	2.632	6
				F (DFn, DFd)	1.148 (2, 6)						Aged L-MSC vs. Aged L-MSC Nox4-/+	4.741	5.328	-0.5867	0.911	3	3	0.9107	6
				P value	0.3784
				P value summary	ns
				Are SDs significantly different (P < 0.05)?	No
				Bartlett's test
				Bartlett's statistic (corrected)
				P value
				P value summary
				Are SDs significantly different (P < 0.05)?
				ANOVA table	SS	DF	MS	F (DFn, DFd)	P value
				Treatment (between columns)	4.449	2	2.225	F (2, 6) = 1.787	P=0.2461
				Residual (within columns)	7.469	6	1.245
				Total	11.92	8
				Data summary
				Number of treatments (columns)	3
				Number of values (total)	9

## Sheet: ig.4-figure supplement 1I
Cytokines	Aged L-MSC												Aged L-MSC Nox4-/+								P value (T-Test)	Mean of Aged L-MSC	Mean of Aged L-MSC Nox4-/+	Difference	SE of difference	t ratio	df	q value
CCL22	4.91	4.12	3.3	3.03	10.04	9.72	9.6	9.25	2.52	2.12	0.98	0.62	1.03	0.9	2.42	2.41	1.15	0.96	1.46	1.31	0.013693	5.018	1.455	3.563	1.304	2.732	18	0.030478
Lipocalin-2	18.02	15.56	9.02	5.78	11.83	10.32	7.75	6.8	18.68	12.42	11.08	5.97	6.08	2.92	3.65	0.68	6.42	2.22	3.79	0	0.000222	11.1	3.22	7.883	1.713	4.601	18	0.001419
CCL5	6.03	4.78	7.38	5.9	8.98	7.39	8.99	6.96	4.85	1.07	3.76	2.29	3.89	2.23	2.42	1.31	2.29	0.16	2.58	0.59	0.000885	5.698	1.934	3.765	0.9467	3.977	18	0.004244
TNFSF13B	22.8	22.46	6.18	5.75	45.73	45.93	40.64	40.38	23.15	21.99	1.31	1.12	13.9	14.49	5.82	5.16	9.62	8.1	3.34	3.34	0.025107	23.12	7.971	15.15	6.201	2.443	18	0.031178
TNF-α	3.78	3.81	5.68	5.76	3.6	4.09	4.76	4.92	1.94	2.35	4.34	4.24	1.09	2.13	2.04	0	2.01	2.12	1.37	0.74	2.1e-05	4.106	1.438	2.668	0.4679	5.703	18	0.0004
CCL21	1.99	1.81	2.08	1.82	4.63	4.71	4.71	4.65	1.62	1.37	0.61	0.42	1.33	1.38	1.48	0.35	1.09	0.96	0.83	0.43	0.019152	2.535	0.9813	1.554	0.6039	2.573	18	0.030478
CD40	3.08	3.04	2.84	2.2	4.89	4.88	4.94	4.7	1.39	0.95	0.61	0.55	0.73	0.96	2.13	1.72	1.21	0.97	1.39	1.12	0.023057	2.839	1.279	1.56	0.6282	2.484	18	0.031178
Pentraxin 2	1.53	1.54	2.41	1.63	4.03	4.29	5.02	4.81	1	1	2.74	2.6	1.98	1.94	1.38	0.84	0.33	1.36	1.24	1.18	0.017315	2.717	1.281	1.435	0.5476	2.621	18	0.030478
RAGE	3.68	5.26	2.57	3.72	5.41	6.5	7.99	8.05	2.76	3.38	1.61	0.87	1.16	2.83	2.08	3.92	2.07	2.96	1.58	0.93	0.027311	4.317	2.191	2.125	0.8848	2.402	18	0.031178
Throbopoietin	3.26	3.26	2.88	2.67	2.92	3.11	3.61	3.42	1.62	1.55	2.84	2.7	1.03	1.86	1.98	1.45	1.08	1.86	1.64	1.54	8.5e-05	2.82	1.555	1.265	0.2511	5.039	18	0.000819
ANGPTL3	3.1	2.65	4.91	5.29	5.61	5.62	5.51	5.44	2.35	2.17	0.72	1.03	2.98	2.66	1.5	1.91	1.78	1.57	1.8	2.16	0.027619	3.7	2.045	1.655	0.6906	2.397	18	0.031178
TIM-1	3.87	4.34	1.35	1.37	3.32	3.17	4.17	4.15	2.75	3.02	3.11	2.99	3.1	3.03	0.01	0.79	2.42	2.67	1.87	1.51	0.019331	3.134	1.925	1.209	0.4707	2.569	18	0.030478
CXCL1	50.62	50.42	42.05	40.37	72.81	69.05	62.61	63.17	67.43	72.32	36.9	36.35	34.06	31.34	28.39	27.58	46.92	47.15	34.71	37.6	0.002354	55.34	35.97	19.37	5.477	3.537	18	0.009035
IL-27	2.62	2.32	2.58	2.84	3.72	3.73	4.37	4.16	1.77	1.71	1.81	1.45	2.14	2.15	1.65	1.48	2.04	2.2	1.49	1.22	0.020647	2.757	1.796	0.9604	0.3785	2.537	18	0.030478
DKK-1	3.25	2.55	3.37	3.07	4.42	4.34	5.15	4.84	2.31	1.72	1.44	1.13	2.67	2.12	2.27	2.07	2.46	1.91	1.65	1.55	0.048606	3.133	2.088	1.045	0.494	2.115	18	0.04115
Endostatin	5.65	5.73	3.12	2.81	6.06	5.57	5.57	5.62	4.75	3.93	1.34	1.37	2.86	3.05	3.95	3.61	2.88	2.38	2.53	2.25	0.04932	4.293	2.939	1.355	0.6426	2.108	18	0.04115
RBP-4	5.65	3.89	4.67	4.1	3.79	3.55	4.6	4.25	3.29	2.89	3.75	3.46	3.95	3.51	2.5	1.69	3.75	3.18	2.12	1.42	0.004726	3.991	2.765	1.226	0.3804	3.222	18	0.015115
DLK-1	3.81	4.13	2.68	2.55	3.87	3.58	5.17	4.82	3.52	1.9	3.03	1.58	2.54	2.74	2.88	2.11	2.74	2.23	2.57	1.57	0.029484	3.387	2.423	0.9642	0.4077	2.365	18	0.031434
Adipsin	2.89	2.85	2.32	2.17	2.87	2.94	3.59	3.54	1.94	2.18	1.43	1.3	2.32	1.8	2.32	2.34	1.71	1.7	1.45	1.49	0.046159	2.502	1.891	0.6104	0.285	2.142	18	0.04115
Serpin F1	8.49	5.85	6.15	6.15	6.75	5.69	7.57	7.28	6.29	5.65	7.82	6.64	5.03	5.99	7.65	6.56	4.88	4.71	3.96	4.46	0.014812	6.694	5.405	1.289	0.4784	2.695	18	0.030478
CCL17	9.49	10.44	8.44	7.8	7.5	7.4	8.99	8.74	10.08	10.52	2.2	2.17	16.49	13.1	9.04	8.29	15.02	13.55	6.71	6.67	0.04117	7.814	11.11	-3.295	1.498	2.199	18	0.039502
IGFBP-2	74.91	56.71	96.08	88.84	18.09	19.15	25.08	26.71	76.19	75.52	71.7	70.4	63.98	49.62	140.37	133.85	57.45	56.29	112.51	118.8	0.037884	58.28	91.61	-33.33	14.87	2.241	18	0.038263
Coag Factor III	65.55	67.34	125.7	132.9	15.25	15.48	18.29	18.13	79.51	68.45	66.78	66.78	84.81	91.77	135.83	143.06	98.41	98.58	112.82	109.66	0.006443	61.68	109.4	-47.69	15.48	3.081	18	0.017662

## Sheet: ig.4-figure supplement 1L
YO-Control	YO+GKT		O = Aged
187	113		Y = Young
179	117
167	209
183	190

## Sheet: ig.4-figure supplement 1M
Young AEC2:Aged L-MSC-Con				Young AEC2:Aged L-MSC-GKT				Transform	Young AEC2:Aged L-MSC-Con				Young AEC2:Aged L-MSC-GKT					Table Analyzed	Transform of YO-ConVs. YO-GKT_100um cutoff
0.00875096	0.00189515	0.0028555	0.00337286	0.00327932	0.00261723	0.0044696	0.00303325	Y=Ln(Y)	-4.73859	-6.26846	-5.85851	-5.69199	-5.72012	-5.94564	-5.41046	-5.79812
0.00875096	0.00148653	0.00203909	0.00188546	0.00302287	0.00194057	0.00200031	0.00243324		-4.73859	-6.51131	-6.19525	-6.27358	-5.80155	-6.24478	-6.21445	-6.01853		Column B	YO-GKT
0.00834919	0.00136604	0.00196341	0.0018549	0.00275332	0.00172493	0.00196586	0.0019479		-4.78559	-6.59584	-6.23307	-6.28992	-5.89495	-6.36257	-6.23182	-6.241		vs.	vs.
0.00834919	0.0012758	0.00182212	0.00138273	0.00193812	0.00142439	0.00189192	0.00188788		-4.78559	-6.66418	-6.30776	-6.58369	-6.24603	-6.55401	-6.27016	-6.2723		Column A	YO-Control
0.00834919	0.00112054	0.00153899	0.000997481	0.00149399	0.00116903	0.00187016	0.00146869		-4.78559	-6.79394	-6.47663	-6.91028	-6.50631	-6.75158	-6.28173	-6.52339
0.00288704	0.00109085	0.00136387	0.000904418	0.00145461	0.000940638	0.00184208	0.00146202		-5.84752	-6.8208	-6.59743	-7.00822	-6.53302	-6.96895	-6.29686	-6.52794		Unpaired t test
0.00230618	0.00094576	0.00129497	0.000889937	0.00140973	0.000933612	0.00162186	0.00144944		-6.07216	-6.96352	-6.64927	-7.02436	-6.56436	-6.97645	-6.42418	-6.53658		P value	0.612
0.00207479	0.000898742	0.00127368	0.000839565	0.00128928	0.00092533	0.0016211	0.00142586		-6.1779	-7.01451	-6.66585	-7.08263	-6.65367	-6.98536	-6.42465	-6.55298		P value summary	ns
0.00204654	0.000838949	0.00121053	0.000793201	0.00123776	0.000884292	0.00152093	0.00112801		-6.1916	-7.08336	-6.7167	-7.13943	-6.69445	-7.03072	-6.48843	-6.7873		Significantly different (P < 0.05)?	No
0.00197404	0.000826054	0.00108346	0.000742396	0.00109421	0.000881787	0.0014724	0.00106141		-6.22767	-7.09885	-6.82759	-7.20563	-6.81773	-7.03356	-6.52086	-6.84816		One- or two-tailed P value?	Two-tailed
0.00149996	0.000787768	0.00105742	0.000734725	0.00105675	0.000839565	0.00145535	0.000917707		-6.50231	-7.14631	-6.85192	-7.21601	-6.85255	-7.08263	-6.53251	-6.99363		t, df	t=0.5093, df=80
0.00145387	0.000766165	0.00102763	0.000688686	0.00104282	0.000679483	0.00143101	0.000872414		-6.53352	-7.17411	-6.8805	-7.28073	-6.86582	-7.29418	-6.54938	-7.04425
0.00137329	0.000733548	0.00100924	0.000677189	0.000959892	0.000669751	0.0012659	0.000859969		-6.59055	-7.21762	-6.89855	-7.29756	-6.94869	-7.3086	-6.67197	-7.05861		How big is the difference?
0.00122447	0.000658361	0.000987713	0.000660065	0.000928512	0.000665757	0.00122098	0.000842646		-6.70525	-7.32576	-6.92012	-7.32317	-6.98193	-7.31459	-6.7081	-7.07896		Mean of column A	-7.091
0.00110499	0.000634093	0.000932974	0.000627934	0.000881787	0.000654389	0.00118695	0.000837718		-6.80792	-7.36331	-6.97713	-7.37308	-7.03356	-7.33181	-6.73637	-7.08483		Mean of column B	-7.039
0.00107743	0.000627934	0.000915805	0.000597992	0.000864318	0.000652124	0.00102829	0.000747722		-6.83317	-7.37308	-6.99571	-7.42193	-7.05357	-7.33528	-6.87986	-7.19848		Difference between means (B - A) ± SEM	0.05185 ± 0.1018
0.00106208	0.000577216	0.000787166	0.000540654	0.00086059	0.000598542	0.00099357	0.000747722		-6.84753	-7.45729	-7.14707	-7.52273	-7.05789	-7.42101	-6.91421	-7.19848		95% confidence interval	-0.1508 to 0.2545
0.00104812	0.000573415	0.00078295		0.000841413	0.000570706	0.000966338	0.000721805		-6.86076	-7.4639	-7.15244		-7.08043	-7.46864	-6.942	-7.23376		R squared (eta squared)	0.003231
0.00101514		0.000732371		0.000799251	0.000570706	0.000945119	0.000702568		-6.89273		-7.21922		-7.13184	-7.46864	-6.9642	-7.26077
0.000976035		0.000724735		0.000753655	0.000569623	0.000906944	0.000672608		-6.93201		-7.2297		-7.19058	-7.47054	-7.00543	-7.30435		F test to compare variances
0.000901263		0.000691571		0.000737673	0.000544381	0.000857487	0.000671465		-7.01171		-7.27654		-7.21201	-7.51586	-7.0615	-7.30605		F, DFn, Dfd	1.130, 44, 36
0.000847584		0.000648165		0.000736493		0.000830958	0.00066918		-7.07312		-7.34137		-7.21361		-7.09293	-7.30946		P value	0.7107
0.000794409		0.00063971		0.000650426		0.000795619	0.000604052		-7.13791		-7.3545		-7.33788		-7.13639	-7.41185		P value summary	ns
0.000725321		0.000616788		0.000650426		0.000744762	0.00056584		-7.2289		-7.39099		-7.33788		-7.20245	-7.4772		Significantly different (P < 0.05)?	No
0.000722391		0.000581569		0.00060626		0.000710708	0.00055776		-7.23294		-7.44978		-7.4082		-7.24925	-7.49158
0.000722391		0.000568541		0.000596892		0.000707215	0.000528997		-7.23294		-7.47244		-7.42377		-7.25418	-7.54453		Data analyzed
0.000711873		0.000563142		0.000596343		0.000701987			-7.24761		-7.48198		-7.42469		-7.2616			Sample size, column A	45
0.000700827		0.000555612		0.000573958		0.00069793			-7.26325		-7.49544		-7.46295		-7.26739			Sample size, column B	37
0.000688686		0.000544381		0.000571789		0.000676616			-7.28073		-7.51586		-7.46674		-7.29841
0.000661202				0.000571247		0.000629053			-7.32145				-7.46769		-7.3713
0.000644779						0.0006257			-7.3466						-7.37664
0.0006257						0.000620125			-7.37664						-7.38559
0.00062291						0.000616788			-7.38111						-7.39099
0.000615677						0.0006035			-7.39279						-7.41276
0.000612902						0.000601846			-7.39731						-7.41551
0.000601295						0.000538528			-7.41642						-7.52667
0.000577216						0.000537997			-7.45729						-7.52766
0.000572873									-7.46485
0.000563681									-7.48102
0.000557223									-7.49255
0.000556149									-7.49447
0.000550789									-7.50416
0.000550254									-7.50513
0.000547582									-7.51
0.000527941									-7.54653

## Sheet: ig.4-figure supplement 1O
OO-Control	OO-Nox4-/+		O = Aged
304	300
305	300
260	267
302	275

## Sheet: ig.4-figure supplement 1P
Aged AEC2:Aged L-MSC				Aged AEC2:Aged Nox4-/+ L-MSC				Transform	Aged AEC2:Aged L-MSC				Aged AEC2:Aged Nox4-/+ L-MSC					Table Analyzed	Transform of OO-ConVs. OO-Nox4-/+- 200 µm cut-off
0.524862	0.114304	0.0884575	0.0439759	0.215011	0.0289534	0.0319911	0.0284564	Y=Ln(Y)	-0.64462	-2.1689	-2.42523	-3.12411	-1.53707	-3.54207	-3.4423	-3.55938
0.0584072	0.0683445	0.0588187	0.0368162	0.0738091	0.0281888	0.0278846	0.0245834		-2.84032	-2.68319	-2.83329	-3.30182	-2.60627	-3.56883	-3.57968	-3.70568		Column B	OO-Nox4het
0.0572479	0.0493141	0.0561808	0.035042	0.029228	0.027975	0.0148419	0.0233067		-2.86036	-3.00955	-2.87918	-3.35121	-3.53263	-3.57644	-4.2103	-3.75901		vs.	vs.
0.0541694	0.042618	0.055774	0.0338436	0.0229211	0.0262841	0.0130992	0.0218425		-2.91564	-3.15548	-2.88645	-3.386	-3.7757	-3.63879	-4.3352	-3.8239		Column A	OO-Control
0.0372863	0.0360427	0.054507	0.0336209	0.0224194	0.0224451	0.0125898	0.0215612		-3.28913	-3.32305	-2.90943	-3.39261	-3.79783	-3.79668	-4.37487	-3.83686
0.036823	0.0328578	0.0533832	0.0297453	0.0191552	0.0220658	0.0116989	0.0191695		-3.30163	-3.41557	-2.93026	-3.51509	-3.95518	-3.81373	-4.44826	-3.95444		Unpaired t test
0.0302087	0.0286234	0.0533536	0.0296111	0.0187927	0.0200215	0.0111335	0.0175833		-3.49963	-3.55353	-2.93081	-3.51961	-3.97429	-3.91095	-4.4978	-4.04081		P value	0.0915
0.0294697	0.0274893	0.0483773	0.0252876	0.0164361	0.0185595	0.00932303	0.0169546		-3.52439	-3.59396	-3.02873	-3.67744	-4.10828	-3.98677	-4.67527	-4.07722		P value summary	ns
0.0284879	0.0272009	0.0409524	0.0242142	0.016311	0.0180343	0.0091736	0.0166961		-3.55828	-3.60451	-3.19535	-3.72081	-4.11591	-4.01548	-4.69143	-4.09258		Significantly different (P < 0.05)?	No
0.0245579	0.0270189	0.0402213	0.0200902	0.0158289	0.0164196	0.00898383	0.0162133		-3.70672	-3.61122	-3.21336	-3.90752	-4.14592	-4.10928	-4.71233	-4.12192		One- or two-tailed P value?	Two-tailed
0.0239144	0.0261848	0.030014	0.0182352	0.0154594	0.0152228	0.00890584	0.0145755		-3.73328	-3.64258	-3.50609	-4.0044	-4.16954	-4.18496	-4.72105	-4.22842		t, df	t=1.696, df=185
0.0223475	0.0253192	0.0275218	0.0174426	0.0153908	0.0146645	0.00810668	0.0143346		-3.80104	-3.67619	-3.59278	-4.04884	-4.17399	-4.22233	-4.81507	-4.24508
0.0205603	0.0224005	0.0250854	0.0171523	0.0153027	0.0144879	0.00790887	0.0131833		-3.8844	-3.79867	-3.68547	-4.06562	-4.17973	-4.23444	-4.83977	-4.32881		How big is the difference?
0.0204679	0.0207309	0.0238843	0.0154889	0.0122914	0.0143595	0.00788524	0.0121872		-3.8889	-3.87613	-3.73453	-4.16763	-4.39886	-4.24335	-4.84276	-4.40737		Mean of column A	-4.745
0.0196747	0.0196297	0.0220095	0.0154398	0.0120919	0.0143547	0.00775962	0.0120872		-3.92842	-3.93071	-3.81628	-4.17081	-4.41522	-4.24368	-4.85882	-4.41561		Mean of column B	-4.9
0.018945	0.0193143	0.0213887	0.0152733	0.0116784	0.0137418	0.00712269	0.0120192		-3.96622	-3.94691	-3.84489	-4.18165	-4.45002	-4.28731	-4.94447	-4.42125		Difference between means (B - A) ± SEM	-0.1552 ± 0.09147
0.0167	0.019152	0.0207847	0.0145799	0.0105532	0.0134619	0.00691822	0.0114797		-4.09235	-3.95535	-3.87354	-4.22811	-4.55132	-4.30789	-4.9736	-4.46717		95% confidence interval	-0.3356 to 0.02530
0.0156556	0.0186523	0.0205577	0.0139209	0.0104928	0.013101	0.00691445	0.00954035		-4.15693	-3.98179	-3.88452	-4.27436	-4.55706	-4.33507	-4.97414	-4.65223		R squared (eta squared)	0.01531
0.0151517	0.0177681	0.019451	0.0130721	0.00902856	0.0124886	0.00688809	0.00942315		-4.18964	-4.03035	-3.93986	-4.33727	-4.70736	-4.38294	-4.97796	-4.66459
0.0148091	0.0174124	0.0183648	0.0122959	0.00893439	0.0123077	0.00635711	0.00893049		-4.21251	-4.05057	-3.99732	-4.39849	-4.71785	-4.39753	-5.05818	-4.71828		F test to compare variances
0.0143484	0.0172354	0.0178219	0.0122278	0.00883648	0.0121636	0.00626574	0.00866514		-4.24412	-4.06079	-4.02733	-4.40405	-4.72887	-4.40931	-5.07266	-4.74845		F, DFn, Dfd	1.608, 115, 70
0.0139116	0.0168833	0.0164209	0.0121734	0.00867814	0.0118949	0.00599431	0.00847897		-4.27503	-4.08143	-4.1092	-4.40851	-4.74695	-4.43164	-5.11694	-4.77017		P value	0.0323
0.0130516	0.0161617	0.0161563	0.0120016	0.00738497	0.0117125	0.00590116	0.00843063		-4.33884	-4.12511	-4.12544	-4.42272	-4.90831	-4.4471	-5.13261	-4.77588		P value summary	*
0.0129209	0.0155091	0.0158882	0.0119295	0.00708025	0.0098278	0.00569511	0.00803929		-4.34891	-4.16633	-4.14218	-4.42874	-4.95045	-4.62254	-5.16815	-4.82341		Significantly different (P < 0.05)?	Yes
0.0127489	0.0145543	0.0150685	0.0117813	0.00704623	0.00971918	0.00548803	0.00793257		-4.36231	-4.22987	-4.19515	-4.44124	-4.95526	-4.63365	-5.20519	-4.83678
0.0118507	0.0143069	0.0146279	0.0113714	0.00691448	0.00951142	0.00518053	0.00788529		-4.43537	-4.24701	-4.22482	-4.47666	-4.97414	-4.65526	-5.26285	-4.84276		Data analyzed
0.0117107	0.0142121	0.0144453	0.0107005	0.00687325	0.00908818	0.00516684	0.00756862		-4.44725	-4.25366	-4.23739	-4.53747	-4.98012	-4.70078	-5.26549	-4.88374		Sample size, column A	116
0.0106192	0.0138493	0.014187	0.0101455	0.00675376	0.00907595	0.00495297	0.0074563		-4.54509	-4.27952	-4.25543	-4.59073	-4.99766	-4.70213	-5.30777	-4.8987		Sample size, column B	71
0.0106149	0.0133317	0.0138971	0.00981893	0.00665719	0.00893772	0.00494623	0.0073407		-4.5455	-4.31761	-4.27607	-4.62344	-5.01206	-4.71748	-5.30913	-4.91432
0.01058	0.013327	0.013727	0.00954605	0.00659799	0.00884865	0.00489242	0.0072793		-4.54879	-4.31796	-4.28839	-4.65163	-5.02099	-4.72749	-5.32007	-4.92272
0.0100441	0.0125382	0.0121506	0.00932961	0.00642513	0.00875585	0.0047654	0.0072066		-4.60077	-4.37898	-4.41037	-4.67456	-5.04754	-4.73803	-5.34637	-4.93276
0.00964838	0.0119393	0.0119925	0.00927576	0.00640317	0.00855126	0.00471557	0.00708851		-4.64096	-4.42792	-4.42347	-4.68035	-5.05096	-4.76168	-5.35689	-4.94928
0.00954291	0.0119304	0.0119655	0.00927576	0.00623566	0.00848341	0.00470894	0.00683177		-4.65196	-4.42867	-4.42573	-4.68035	-5.07747	-4.76964	-5.35829	-4.98617
0.00936658	0.0111096	0.0116872	0.00926334	0.00619944	0.00828493	0.00468245	0.0065708		-4.67061	-4.49995	-4.44926	-4.68169	-5.0833	-4.79332	-5.36393	-5.02512
0.00914148	0.0110443	0.0116247	0.00915188	0.00613803	0.00808018	0.00456057	0.00651901		-4.69493	-4.50585	-4.45462	-4.6938	-5.09325	-4.81834	-5.39031	-5.03303
0.00904203	0.010901	0.0115178	0.00911482	0.00596217	0.00802143	0.00453109	0.00645999		-4.70587	-4.5189	-4.46386	-4.69785	-5.12232	-4.82564	-5.39679	-5.04213
0.00888531	0.0108447	0.0115133	0.00897938	0.00582696	0.00773758	0.0044821	0.00643791		-4.72336	-4.52408	-4.46425	-4.71282	-5.14526	-4.86167	-5.40766	-5.04555
0.00887708	0.0105991	0.0113049	0.00889763	0.00539303	0.00739997	0.0044821	0.00614948		-4.72428	-4.54699	-4.48252	-4.72197	-5.22265	-4.90628	-5.40766	-5.09139
0.00885243	0.0105691	0.0111154	0.00868219	0.00536198	0.0072255	0.00447232	0.00610605		-4.72706	-4.54982	-4.49943	-4.74648	-5.22842	-4.93014	-5.40985	-5.09847
0.00850562	0.0104962	0.0110627	0.00831243	0.00529317	0.00720285	0.00443328	0.00595846		-4.76703	-4.55674	-4.50418	-4.79	-5.24134	-4.93328	-5.41862	-5.12294
0.00833999	0.0104321	0.010783	0.00819699	0.00526574	0.00713503	0.00438464	0.00589762		-4.78669	-4.56286	-4.52979	-4.80399	-5.24653	-4.94274	-5.42965	-5.13321
0.00812751	0.00997022	0.0102308	0.0081573	0.00518712	0.0069254	0.00432973	0.00579076		-4.8125	-4.60815	-4.58235	-4.80884	-5.26158	-4.97256	-5.44225	-5.15149
0.00807567	0.00946982	0.0100093	0.00814145	0.00508517	0.00681026	0.00431362	0.00555797		-4.8189	-4.65965	-4.60424	-4.81079	-5.28143	-4.98932	-5.44598	-5.19252
0.00801997	0.00933372	0.00995415	0.00811373	0.00506148	0.00680285	0.00430397	0.0053353		-4.82582	-4.67412	-4.60977	-4.8142	-5.2861	-4.99041	-5.44822	-5.23341
0.0079525	0.00898215	0.00990334	0.00753892	0.00505133	0.00678065		0.00528355		-4.83427	-4.71252	-4.61488	-4.88768	-5.2881	-4.99368		-5.24316
0.0079129	0.00896997	0.00986108	0.00733899	0.00490671	0.0066884		0.00522854		-4.83926	-4.71387	-4.61916	-4.91455	-5.31715	-5.00738		-5.25362
0.00752446	0.0086351	0.00968002	0.00701605	0.00490671	0.0066884		0.00516004		-4.8896	-4.75192	-4.63769	-4.95956	-5.31715	-5.00738		-5.26681
0.00713495	0.00859104	0.009546	0.00667572	0.00490671	0.00665529		0.00515662		-4.94275	-4.75704	-4.65163	-5.00928	-5.31715	-5.01234		-5.26747
0.00711585	0.00836791	0.00947922	0.00651689	0.00453992	0.00652706		0.00514979		-4.94543	-4.78335	-4.65865	-5.03336	-5.39485	-5.0318		-5.2688
0.00706626	0.00812315	0.00935444	0.00647646	0.0045334	0.00629474		0.00513273		-4.95242	-4.81304	-4.6719	-5.03958	-5.39628	-5.06804		-5.27212
0.00670742	0.00785363	0.00933785	0.00644344	0.00451711	0.00628031		0.00512591		-5.00454	-4.84678	-4.67368	-5.04469	-5.39988	-5.07034		-5.27345
0.00650254	0.00775286	0.00907776	0.00643611	0.00451711	0.00612951		0.00499688		-5.03556	-4.85969	-4.70193	-5.04583	-5.39988	-5.09464		-5.29894
0.00648772	0.00773353	0.00906133	0.0063922	0.00445215	0.00605812		0.00497661		-5.03784	-4.86219	-4.70374	-5.05268	-5.41437	-5.10636		-5.30301
0.00640273	0.0073998	0.00888534	0.00635933	0.00439073	0.00598347		0.00495974		-5.05103	-4.9063	-4.72335	-5.05783	-5.42826	-5.11875		-5.3064
0.00626315	0.00739599	0.00888126	0.00634109		0.00575787		0.00480542		-5.07307	-4.90682	-4.72381	-5.0607		-5.15719		-5.33801
0.00625949	0.00737696	0.00869024	0.00633015		0.00559058		0.00446909		-5.07366	-4.90939	-4.74556	-5.06243		-5.18667		-5.41057
0.00614276	0.00736175	0.00861341	0.00612721		0.00552136		0.00437819		-5.09248	-4.91146	-4.75443	-5.09502		-5.19913		-5.43112
0.00609918	0.00725936	0.00852876	0.0061128		0.00525417		0.00431043		-5.0996	-4.92546	-4.76431	-5.09737		-5.24873		-5.44672
0.00604123	0.00721023	0.00831238	0.00592292		0.00524738		0.00424622		-5.10915	-4.93225	-4.79001	-5.12893		-5.25003		-5.46173
0.00598707	0.00718759	0.00826056	0.00583405		0.0052372				-5.11815	-4.9354	-4.79626	-5.14404		-5.25197
0.00593667	0.00714239	0.00820885	0.00581633		0.00517961				-5.12661	-4.94171	-4.80254	-5.14709		-5.26302
0.00593308	0.00710854	0.00814536	0.00564363		0.00513235				-5.12721	-4.94646	-4.81031	-5.17723		-5.27219
0.00584702	0.00698118	0.00805833	0.0056156		0.00504497				-5.14182	-4.96454	-4.82105	-5.18221		-5.28936
0.00580058	0.00683975	0.00775619	0.00558412		0.00496141				-5.1498	-4.985	-4.85926	-5.18783		-5.30606
0.00569035	0.00682121	0.00758914	0.00558063		0.00484192				-5.16898	-4.98772	-4.88104	-5.18845		-5.33044
0.00565847	0.00678419	0.0075466	0.00537922		0.00475293				-5.1746	-4.99316	-4.88666	-5.22521		-5.34899
0.00564433	0.00676201	0.00752344	0.00536542		0.00457987				-5.1771	-4.99644	-4.88973	-5.22778		-5.38608
0.00556673	0.00665881	0.00745023	0.00524519		0.00450221				-5.19095	-5.01181	-4.89951	-5.25044		-5.40319
0.005465	0.00658176	0.00742716	0.00522467		0.00446355				-5.20939	-5.02345	-4.90261	-5.25436		-5.41181
0.00546151	0.00643219	0.00737725	0.00518371		0.0042973				-5.21003	-5.04644	-4.90935	-5.26223		-5.44977
0.00539172	0.00635603	0.00733511	0.00508856		0.00422444				-5.22289	-5.05835	-4.91508	-5.28076		-5.46687
0.00525997	0.00605086	0.00705752	0.00506824						-5.24763	-5.10756	-4.95366	-5.28476
0.00522548	0.00600463	0.00699716	0.00494693						-5.25421	-5.11523	-4.96225	-5.30899
0.0049726	0.00590899	0.00684701	0.00492346						-5.30381	-5.13128	-4.98394	-5.31374
0.00481083	0.00589133	0.00681711	0.00490337						-5.33689	-5.13427	-4.98832	-5.31783
0.00477735	0.0058596	0.00674627	0.00489333						-5.34387	-5.13967	-4.99876	-5.31988
0.00476064	0.00575423	0.00673883	0.00483659						-5.34737	-5.15782	-4.99987	-5.33154
0.00471063	0.00572275	0.00672767	0.00482993						-5.35793	-5.16331	-5.00153	-5.33292
0.00461444	0.00568086	0.00658687	0.00481995						-5.37856	-5.17065	-5.02268	-5.33499
0.00445996	0.00562169	0.00655367	0.00476018						-5.41262	-5.18112	-5.02773	-5.34747
0.00445669	0.00557312	0.00654999	0.00469407						-5.41335	-5.1898	-5.02829	-5.36146
	0.00556273	0.00652421	0.00466442							-5.19167	-5.03224	-5.36779
	0.00549707	0.00652053	0.00465126							-5.20354	-5.0328	-5.37062
	0.00549707	0.00642142	0.00462827							-5.20354	-5.04812	-5.37557
	0.00549362	0.00633376	0.00459221							-5.20417	-5.06186	-5.38339
	0.00532213	0.00627918	0.00453666							-5.23588	-5.07052	-5.39556
	0.00524726	0.00616687	0.00432317							-5.25005	-5.08856	-5.44377
	0.00517949	0.00615964	0.00430714							-5.26305	-5.08974	-5.44748
	0.00516597	0.00603371	0.00423364							-5.26566	-5.11039	-5.46469
	0.00515247	0.00594428								-5.26828	-5.12533
	0.0050952	0.00590864								-5.27946	-5.13134
	0.00509184	0.00582693								-5.28012	-5.14527
	0.0050549	0.00566816								-5.2874	-5.17289
	0.00494464	0.00558059								-5.30945	-5.18846
	0.00491139	0.00547611								-5.3162	-5.20736
	0.00473969	0.00545529								-5.35178	-5.21117
	0.00470035	0.00544489								-5.36012	-5.21308
	0.00467093	0.00543104								-5.3664	-5.21562
	0.00459275	0.0053516								-5.38328	-5.23036
	0.00452148	0.00527942								-5.39892	-5.24394
	0.00436089	0.00518368								-5.43508	-5.26224
	0.0043545	0.00514623								-5.43654	-5.26949
		0.00511565									-5.27545
		0.00510887									-5.27678
		0.00509869									-5.27877
		0.00501755									-5.29481
		0.00499396									-5.29953
		0.00499059									-5.3002
		0.00492008									-5.31443
		0.00491003									-5.31648
		0.00490668									-5.31716
		0.00469734									-5.36076
		0.00459218									-5.3834
		0.00453338									-5.39629
		0.00446833									-5.41074
		0.00422724									-5.46621
