# Supplementary material for: Mesenchymal stromal cell aging impairs the self-organizing capacity of lung alveolar epithelial stem cells
Source: eLife. 2021 Sep 16;10:e68049. doi: 10.7554/eLife.68049 (PMC8445616; doi:10.7554/eLife.68049)
Supplement: Figure 4—source data 1. [file elife-68049-fig4-data1.xlsx]

## Sheet: Figure 4A
Treatment	Young L-MSC						Aged L-MSC						P value	Mean of Young L-MSC	Mean of Aged L-MSC	Difference	SE of difference	t ratio	df	q value
VEH	12.8748	12.5221	12.816	13.1099	12.4926	12.8454	16.9878	19.1073	17.4053	17.8548	17.9191	16.6667	<0.000001	12.78	17.66	-4.88	0.364	13.41	10	<0.000001
TGF-b1	25.8532	27.3606	24.1183	23.3788	23.777	25.0569	37.9132	37.3623	39.1873	41.2534	33.9532	33.2989	5e-06	24.92	37.16	-12.24	1.388	8.813	10	5e-06

## Sheet: Figure 4B
Aged L-MSC			Unpaired t test
WT	Nox4-/+		P value	0.0015
1.15067	0.41652		P value summary	**
0.924191	0.417523	#1	Significantly different (P < 0.05)?	Yes
0.940349	0.439578		One- or two-tailed P value?	Two-tailed
	0.425108		t, df	t=7.753, df=4
	0.448112	#2
	0.493377		How big is the difference?
	0.37713		Mean of column A	1.005
	0.429176	#3	Mean of column B	0.4309
	0.431301		Difference between means (B - A) ± SEM	-0.5742 ± 0.07406
			95% confidence interval	-0.7798 to -0.3686
			R squared (eta squared)	0.9376
			F test to compare variances
			F, DFn, Dfd	32.43, 2, 2
			P value	0.0598
			P value summary	ns
			Significantly different (P < 0.05)?	No
			Data analyzed
			Sample size, column A	3
			Sample size, column B	3

## Sheet: Figure 4C
	Aged L-MSC
Treatment	WT						Nox4-/+						P value	Mean of Young L-MSC	Mean of Aged L-MSC	Difference	SE of difference	t ratio	df	q value
VEH	10.4242	10.3333	12.7576	10.0303	12.6667	12.0909	3.81543	3.53994	3.26446	5.20661	5.0551	4.28375	<0.000001	11.38	4.194	7.19	0.6083	11.82	10	<0.000001
TGF-b1	33.8506	33.3908	32.069	35.0575	27.1839	27.069	12.3333	13.1364	12.7424	11.8636	10.0909	10.9697	<0.000001	31.44	11.86	19.58	1.493	13.11	10	<0.000001

## Sheet: Figure 4D
	Aged L-MSC			Young L-MSC vs. Aged L-MSC			Aged L-MSC (WT vs Nox4-/+)			ANOVA summary							Tukey's multiple comparisons test	Mean Diff.	95.00% CI of diff.	Below threshold?	Summary	Adjusted P Value
Young	WT	NOX4-/+		Unpaired t test			Unpaired t test			F	7.727						Young L-MSC vs. Aged L-MSC WT	2.467	0.7924 to 4.141	Yes	**	0.0052	A-B
3.12062	1.53031	1.80202		P value	0.0026		P value	0.0479		P value	0.007						Young L-MSC vs. Aged L-MSC Nox4-/+	1.271	-0.4037 to 2.945	No	ns	0.1486	A-C
5.89129	1.50716	2.11576		P value summary	**		P value summary	*		P value summary	**						Aged L-MSC WT vs. Aged L-MSC Nox4-/+	-1.196	-2.870 to 0.4781	No	ns	0.1793	B-C
3.00605	1.6871	3.55691		Significantly different (P < 0.05)?	Yes		Significantly different (P < 0.05)?	Yes		Significant diff. among means (P < 0.05)?	Yes
3.47995	1.6967	4.47602		One- or two-tailed P value?	Two-tailed		One- or two-tailed P value?	Two-tailed		R squared	0.5629						Test details	Mean 1	Mean 2	Mean Diff.	SE of diff.	n1	n2	q	DF
5.0013	1.74507	2.19589		t, df	t=4.291, df=8		t, df	t=2.334, df=8									Young L-MSC vs. Aged L-MSC WT	4.1	1.633	2.467	0.6275	5	5	5.559	12
										Brown-Forsythe test							Young L-MSC vs. Aged L-MSC Nox4-/+	4.1	2.829	1.271	0.6275	5	5	2.863	12
				How big is the difference?			How big is the difference?			F (DFn, DFd)	1.705 (2, 12)						Aged L-MSC WT vs. Aged L-MSC Nox4-/+	1.633	2.829	-1.196	0.6275	5	5	2.695	12
				Mean of column A	4.1		Mean of column B	1.633		P value	0.223
				Mean of column B	1.633		Mean of column C	2.829		P value summary	ns
				Difference between means (B - A) ± SEM	-2.467 ± 0.5748		Difference between means (C - B) ± SEM	1.196 ± 0.5125		Are SDs significantly different (P < 0.05)?	No
				95% confidence interval	-3.792 to -1.141		95% confidence interval	0.01427 to 2.378
				R squared (eta squared)	0.6972		R squared (eta squared)	0.4051		Bartlett's test
										Bartlett's statistic (corrected)	13.18
				F test to compare variances			F test to compare variances			P value	0.0014
				F, DFn, Dfd	142.9, 4, 4		F, DFn, Dfd	113.4, 4, 4		P value summary	**
				P value	0.0003		P value	0.0005		Are SDs significantly different (P < 0.05)?	Yes
				P value summary	***		P value summary	***
				Significantly different (P < 0.05)?	Yes		Significantly different (P < 0.05)?	Yes		ANOVA table	SS	DF	MS	F (DFn, DFd)	P value
										Treatment (between columns)	15.21	2	7.607	F (2, 12) = 7.727	P=0.0070
				Data analyzed			Data analyzed			Residual (within columns)	11.81	12	0.9845
				Sample size, column A	5		Sample size, column B	5		Total	27.03	14
				Sample size, column B	5		Sample size, column C	5
										Data summary
										Number of treatments (columns)	3
										Number of values (total)	15

## Sheet: Figure 4 E-F
Figure 4E	Aged L-MSC			ANOVA summary							Tukey's multiple comparisons test	Mean Diff.	95.00% CI of diff.	Below threshold?	Summary	Adjusted P Value
Young	WT	NOX4-/+		F	12.07						Young vs. WT	0.8027	0.2443 to 1.361	Yes	*	0.0107	A-B
2.773	1.78	2.812		P value	0.0079						Young vs. NOX4-/+	0.06	-0.4984 to 0.6184	No	ns	0.9424	A-C
2.518	1.972	2.781		P value summary	**						WT vs. NOX4-/+	-0.7427	-1.301 to -0.1843	Yes	*	0.0153	B-C
2.675	1.806	2.193		Significant diff. among means (P < 0.05)?	Yes
				R squared	0.8009						Test details	Mean 1	Mean 2	Mean Diff.	SE of diff.	n1	n2	q	DF
											Young vs. WT	2.655	1.853	0.8027	0.182	3	3	6.237	6
				Brown-Forsythe test							Young vs. NOX4-/+	2.655	2.595	0.06	0.182	3	3	0.4663	6
				F (DFn, DFd)	0.4293 (2, 6)						WT vs. NOX4-/+	1.853	2.595	-0.7427	0.182	3	3	5.771	6
				P value	0.6695
				P value summary	ns
				Are SDs significantly different (P < 0.05)?	No
				Bartlett's test
				Bartlett's statistic (corrected)
				P value
				P value summary
				Are SDs significantly different (P < 0.05)?
				ANOVA table	SS	DF	MS	F (DFn, DFd)	P value
				Treatment (between columns)	1.199	2	0.5997	F (2, 6) = 12.07	P=0.0079
				Residual (within columns)	0.2981	6	0.04968
				Total	1.498	8
				Data summary
				Number of treatments (columns)	3
				Number of values (total)	9
Figure 4F	Aged L-MSC			ANOVA summary							Tukey's multiple comparisons test	Mean Diff.	95.00% CI of diff.	Below threshold?	Summary	Adjusted P Value
Young	WT	NOX4-/+		F	3.481						Young L-MSC vs. Aged L-MSC WT	10.76	-2.527 to 24.04	No	ns	0.1041	A-B
24.76	13.37	33.33		P value	0.0992						Young L-MSC vs. Aged L-MSC Nox4-/+	2.047	-11.24 to 15.33	No	ns	0.8863	A-C
26.43	17.86	16.5		P value summary	ns						Aged L-MSC WT vs. Aged L-MSC Nox4-/+	-8.71	-21.99 to 4.574	No	ns	0.1901	B-C
29.97	17.66	25.19		Significant diff. among means (P < 0.05)?	No
				R squared	0.5371						Test details	Mean 1	Mean 2	Mean Diff.	SE of diff.	n1	n2	q	DF
											Young L-MSC vs. Aged L-MSC WT	27.05	16.3	10.76	4.329	3	3	3.514	6
				Brown-Forsythe test							Young L-MSC vs. Aged L-MSC Nox4-/+	27.05	25.01	2.047	4.329	3	3	0.6685	6
				F (DFn, DFd)	1.468 (2, 6)						Aged L-MSC WT vs. Aged L-MSC Nox4-/+	16.3	25.01	-8.71	4.329	3	3	2.845	6
				P value	0.3027
				P value summary	ns						Column B	Aged L-MSC
				Are SDs significantly different (P < 0.05)?	No						vs.	vs.
											Column A	Young L-MSC
				Bartlett's test
				Bartlett's statistic (corrected)							Unpaired t test
				P value							P value	0.0071
				P value summary							P value summary	**
				Are SDs significantly different (P < 0.05)?							Significantly different (P < 0.05)?	Yes
											One- or two-tailed P value?	Two-tailed
				ANOVA table	SS	DF	MS	F (DFn, DFd)	P value		t, df	t=5.069, df=4
				Treatment (between columns)	195.8	2	97.88	F (2, 6) = 3.481	P=0.0992
				Residual (within columns)	168.7	6	28.12				How big is the difference?
				Total	364.5	8					Mean of column A	27.05
											Mean of column B	16.3
				Data summary							Difference between means (B - A) ± SEM	-10.76 ± 2.122
				Number of treatments (columns)	3						95% confidence interval	-16.65 to -4.864
				Number of values (total)	9						R squared (eta squared)	0.8653
											F test to compare variances
											F, DFn, Dfd	1.100, 2, 2
											P value	0.9524
											P value summary	ns
											Significantly different (P < 0.05)?	No
											Data analyzed
											Sample size, column A	3
											Sample size, column B	3
											Column C Aged L-MSC	NOX4-/+
											vs.	vs.
											Column B Aged L-MSC	WT
											Unpaired t test
											P value	0.1613
											P value summary	ns
											Significantly different (P < 0.05)?	No
											One- or two-tailed P value?	Two-tailed
											t, df	t=1.716, df=4
											How big is the difference?
											Mean of column B	16.3
											Mean of column C	25.01
											Difference between means (C - B) ± SEM	8.710 ± 5.075
											95% confidence interval	-5.381 to 22.80
											R squared (eta squared)	0.4241
											F test to compare variances
											F, DFn, Dfd	11.01, 2, 2
											P value	0.1665
											P value summary	ns
											Significantly different (P < 0.05)?	No
											Data analyzed
											Sample size, column B	3
											Sample size, column C	3

## Sheet: Figure 4G
Time (min)	Young L-MSC				Aged L-MSC				Aged Nox4-/+ L-MSC				Young vs. Aged	Young vs. Nox4-/+	Aged vs. Aged Nox4-/+
1	145	146	186	179	205	214	240	227	177	174	188	174	0.0015	0.4397	0.0093
10	139	137	176	170	195	202	228	219	167	166	181	167	0.0016	0.3958	0.0109
18	139	137	175	170	194	201	228	220	165	163	180	167	0.0017	0.462	0.0098
27	141	139	176	171	196	203	230	222	165	163	181	167	0.0015	0.5178	0.0073
36	49	50	64	61	69	71	82	79	57	56	68	65	0.0067	0.497	0.0402
44	50	51	65	61	68	70	83	78	56	55	70	68	0.0186	0.5676	0.0946
53	422	438	446	438	497	531	520	519	440	441	455	416	<0.0001	0.977	<0.0001
61	443	442	431	424	517	552	493	492	451	456	418	401	0.0024	0.9746	0.0018
70	29	33	44	42	39	42	52	50	34	34	42	43	0.1671	0.9561	0.2513
79	29	31	42	40	41	44	53	51	36	36	46	45	0.0479	0.4505	0.3105
87	29	31	40	38	41	43	50	48	35	35	44	43	0.0259	0.3866	0.2156
96	25	27	39	37	37	38	47	44	32	32	41	41	0.1015	0.5343	0.4669
104	23	24	39	38	33	35	45	41	29	29	38	38	0.2965	0.858	0.5585
113	21	22	38	35	31	32	45	40	27	27	37	36	0.2978	0.8505	0.5694
													p values; One-way ANOVA/Tukey's multiple comparison test

## Sheet: Figure 4H
	Basal OCR		Number of families	1
Young L-MSC	Aged L-MSC	Aged Nox4-/+ L-MSC	Number of comparisons per family	3
112	155	130	Alpha	0.05
108	160	128
137	180	138	Tukey's multiple comparisons test	Mean Diff.	95.00% CI of diff.	Below threshold?	Summary	Adjusted P Value
134	174	124	Young vs. Aged	-44.5	-67.08 to -21.92	Yes	***	0.001	A-B
			Young vs. Nox4-/+	-7.25	-29.83 to 15.33	No	ns	0.6559	A-C
			Aged vs. Aged Nox4-/+	37.25	14.67 to 59.83	Yes	**	0.0033	B-C
			Test details	Mean 1	Mean 2	Mean Diff.	SE of diff.	n1	n2	q	DF
			Young vs. Aged	122.8	167.3	-44.5	8.088	4	4	7.781	9
			Young vs. Nox4-/+	122.8	130	-7.25	8.088	4	4	1.268	9
			Aged vs. Aged Nox4-/+	167.3	130	37.25	8.088	4	4	6.513	9
	ATP-Linked
Young L-MSC	Aged L-MSC	Aged Nox4-/+ L-MSC	Number of families	1
91	128	108	Number of comparisons per family	3
88	132	108	Alpha	0.05
112	146	112
110	143	100	Tukey's multiple comparisons test	Mean Diff.	95.00% CI of diff.	Below threshold?	Summary	Adjusted P Value
			Young vs. Aged	-37	-55.23 to -18.77	Yes	***	0.0008	A-B
			Young vs. Nox4-/+	-6.75	-24.98 to 11.48	No	ns	0.5756	A-C
			Aged vs. Aged Nox4-/+	30.25	12.02 to 48.48	Yes	**	0.0032	B-C
			Test details	Mean 1	Mean 2	Mean Diff.	SE of diff.	n1	n2	q	DF
			Young vs. Aged	100.3	137.3	-37	6.53	4	4	8.013	9
			Young vs. Nox4-/+	100.3	107	-6.75	6.53	4	4	1.462	9
			Aged vs. Aged Nox4-/+	137.3	107	30.25	6.53	4	4	6.551	9
	Proton Leak
Young L-MSC	Aged L-MSC	Aged Nox4-/+ L-MSC	Number of families	1
21	27	22	Number of comparisons per family	3
20	28	20	Alpha	0.05
25	33	26
23	30	24	Tukey's multiple comparisons test	Mean Diff.	95.00% CI of diff.	Below threshold?	Summary	Adjusted P Value
			Young vs. Aged	-7.25	-12.16 to -2.336	Yes	**	0.0066	A-B
			Young vs. Nox4-/+	-0.75	-5.664 to 4.164	No	ns	0.9058	A-C
			Aged vs. Aged Nox4-/+	6.5	1.586 to 11.41	Yes	*	0.0124	B-C
			Test details	Mean 1	Mean 2	Mean Diff.	SE of diff.	n1	n2	q	DF
			Young vs. Aged	22.25	29.5	-7.25	1.76	4	4	5.826	9
			Young vs. Nox4-/+	22.25	23	-0.75	1.76	4	4	0.6027	9
			Aged vs. Aged Nox4-/+	29.5	23	6.5	1.76	4	4	5.223	9
	Maximal
Young L-MSC	Aged L-MSC	Aged Nox4-/+ L-MSC	Number of families	1
414	477	416	Number of comparisons per family	3
411	510	421	Alpha	0.05
392	443	374
386	444	358	Tukey's multiple comparisons test	Mean Diff.	95.00% CI of diff.	Below threshold?	Summary	Adjusted P Value
			Young vs. Aged	-67.75	-120.9 to -14.63	Yes	*	0.0152	A-B
			Young vs. Nox4-/+	8.5	-44.62 to 61.62	No	ns	0.897	A-C
			Aged vs. Aged Nox4-/+	76.25	23.13 to 129.4	Yes	**	0.0078	B-C
			Test details	Mean 1	Mean 2	Mean Diff.	SE of diff.	n1	n2	q	DF
			Young vs. Aged	400.8	468.5	-67.75	19.03	4	4	5.036	9
			Young vs. Nox4-/+	400.8	392.3	8.5	19.03	4	4	0.6318	9
			Aged vs. Aged Nox4-/+	468.5	392.3	76.25	19.03	4	4	5.667	9
	Reserve Capacity
Young L-MSC	Aged L-MSC	Aged Nox4-/+ L-MSC	Number of families	1
302	321	286	Number of comparisons per family	3
303	349	293	Alpha	0.05
255	264	237
253	271	234	Tukey's multiple comparisons test	Mean Diff.	95.00% CI of diff.	Below threshold?	Summary	Adjusted P Value
			Young vs. Aged	-23	-89.70 to 43.70	No	ns	0.6169	A-B
			Young vs. Nox4-/+	15.75	-50.95 to 82.45	No	ns	0.792	A-C
			Aged vs. Aged Nox4-/+	38.75	-27.95 to 105.4	No	ns	0.286	B-C
			Test details	Mean 1	Mean 2	Mean Diff.	SE of diff.	n1	n2	q	DF
			Young vs. Aged	278.3	301.3	-23	23.89	4	4	1.362	9
			Young vs. Nox4-/+	278.3	262.5	15.75	23.89	4	4	0.9324	9
			Aged vs. Aged Nox4-/+	301.3	262.5	38.75	23.89	4	4	2.294	9
	Non-Mito
Young L-MSC	Aged L-MSC	Aged Nox4-/+ L-MSC	Number of families	1
29	41	35	Number of comparisons per family	3
31	43	35	Alpha	0.05
40	50	44
38	48	43	Tukey's multiple comparisons test	Mean Diff.	95.00% CI of diff.	Below threshold?	Summary	Adjusted P Value
			Young vs. Aged	-11	-20.55 to -1.446	Yes	*	0.0259	A-B
			Young vs. Nox4-/+	-4.75	-14.30 to 4.804	No	ns	0.3866	A-C
			Aged vs. Aged Nox4-/+	6.25	-3.304 to 15.80	No	ns	0.2156	B-C
			Test details	Mean 1	Mean 2	Mean Diff.	SE of diff.	n1	n2	q	DF
			Young vs. Aged	34.5	45.5	-11	3.422	4	4	4.546	9
			Young vs. Nox4-/+	34.5	39.25	-4.75	3.422	4	4	1.963	9
			Aged vs. Aged Nox4-/+	45.5	39.25	6.25	3.422	4	4	2.583	9

## Sheet: Figure 4J
Young AEC2: Young L-MSC	Young AEC2: Aged L-MSC	Young AEC2: Aged L-MSC-NOX4-/+
67	18	65
48	4	66
78	6	67
ANOVA summary							Tukey's multiple comparisons test	Mean Diff.	95.00% CI of diff.	Below threshold?	Summary	Adjusted P Value
F	32.42						Young AEC2: Young L-MSC	55	30.43 to 79.57	Yes	**	0.0011	A-B
P value	0.0006						Young AEC2: Aged L-MSC	-1.667	-26.24 to 22.91	No	ns	0.9765	A-C
P value summary	***						Young AEC2: Aged L-MSC-NOX4-/+	-56.67	-81.24 to -32.09	Yes	***	0.001	B-C
Significant diff. among means (P < 0.05)?	Yes
R squared	0.9153						Test details	Mean 1	Mean 2	Mean Diff.	SE of diff.	n1	n2	q	DF
							Young AEC2: Young L-MSC	64.33	9.333	55	8.009	3	3	9.711	6
Brown-Forsythe test							Young AEC2: Aged L-MSC	64.33	66	-1.667	8.009	3	3	0.2943	6
F (DFn, DFd)	1.487 (2, 6)						Young AEC2: Aged L-MSC-NOX4-/+	9.333	66	-56.67	8.009	3	3	10.01	6
P value	0.2988
P value summary	ns
Are SDs significantly different (P < 0.05)?	No
Bartlett's test
Bartlett's statistic (corrected)
P value
P value summary
Are SDs significantly different (P < 0.05)?
ANOVA table	SS	DF	MS	F (DFn, DFd)	P value
Treatment (between columns)	6239	2	3119	F (2, 6) = 32.42	P=0.0006
Residual (within columns)	577.3	6	96.22
Total	6816	8
Data summary
Number of treatments (columns)	3
Number of values (total)	9

## Sheet: Figure 4K
Young AEC2:Young L-MSC (YY)			Young AEC2:Aged L-MSC (YO)			YoungAEC2:Aged-NOX4-/+ L-MSC (YO-Nox4-/+)				YY-pooled	YO-pooled	YO-Nox4-/+-pooled	Transform	YY-pooled	YO-pooled	YO-Nox4-/+-pooled		Table Analyzed	Transform of Alveolosphere_All values
0.000682007	0.001779	0.029144	0.003107	0.000359	0.002179	0.003415	0.001165	0.000262		0.000682007	0.003107	0.003415	Y= Ln (Y)	-7.29047	-5.7741	-5.67958		Data sets analyzed	A-C
0.000397467	0.001515	0.005512	0.000561	0.00014	0.002246	0.000448	0.001193	0.000487		0.000397467	0.000561	0.000448		-7.8304	-7.48579	-7.71072
0.00125388	0.001781	0.009145	0.000407	0.000628	0.001201	0.000998	0.001252	0.000254		0.00125388	0.000407	0.000998		-6.68151	-7.8067	-6.90976		ANOVA summary
0.00121392	0.00166	0.007949	0.000218	0.000531	0.000344	0.000723	0.00115	0.00033		0.00121392	0.000218	0.000723		-6.7139	-8.43102	-7.2321		F	108.4
0.00213117	0.001852	0.003932	0.000201		0.001918	0.00047	0.001376	0.000341		0.00213117	0.000201	0.00047		-6.15108	-8.51221	-7.66278		P value	<0.0001
0.000623526	0.000247	0.032317	0.000431		0.000934	0.000323	0.000749	0.000467		0.000623526	0.000431	0.000323		-7.38012	-7.7494	-8.03786		P value summary	****
0.000413224	0.000249	0.020349	0.000454			0.001456	0.001321	0.000277		0.000413224	0.000454	0.001456		-7.79152	-7.69741	-6.53206		Significant diff. among means (P < 0.05)?	Yes
0.00110581	0.000103	0.007213	0.001341			0.004529	0.000561	0.000369		0.00110581	0.001341	0.004529		-6.80718	-6.61434	-5.39725		R squared	0.3426
0.0014863	0.001468	0.008302	0.000793			0.00021	0.000861	0.000298		0.0014863	0.000793	0.00021		-6.51146	-7.13969	-8.4684
0.000509108	0.000631	0.007378	0.000806			0.000271	0.000129	0.000912		0.000509108	0.000806	0.000271		-7.58285	-7.12343	-8.21339		Brown-Forsythe test
0.00130008	0.002514	0.00155	0.001067			0.000278	0.000205	0.000256		0.00130008	0.001067	0.000278		-6.64533	-6.8429	-8.18789		F (DFn, DFd)	1.735 (2, 416)
0.00260135	0.001753	0.006545	0.00118			0.000383	9.66e-05	0.000248		0.00260135	0.00118	0.000383		-5.95172	-6.74224	-7.86748		P value	0.1777
0.000294262	0.001195	0.002099	0.000549			0.000137	0.000133	0.004336		0.000294262	0.000549	0.000137		-8.13104	-7.50741	-8.89553		P value summary	ns
0.00277902	0.000639	0.017264	0.000287			0.000174	8.08e-05	0.000124		0.00277902	0.000287	0.000174		-5.88566	-8.15603	-8.65646		Are SDs significantly different (P < 0.05)?	No
0.00190256	0.000363	0.000863	0.000488			0.000829	3.3e-05	0.000291		0.00190256	0.000488	0.000829		-6.26455	-7.6252	-7.09529
0.000287209	0.002159	0.003746	0.00031			0.000912	1.99e-05	0.000778		0.000287209	0.00031	0.000912		-8.1553	-8.07894	-6.99987		Bartlett's test
0.00416388	0.001962	0.001227	0.001938			0.000219	6.17e-05	0.000781		0.00416388	0.001938	0.000219		-5.48131	-6.2461	-8.42644		Bartlett's statistic (corrected)	4.35
0.00530062	0.000283	0.004022	0.000762			0.000169	3.83e-05	0.003274		0.00530062	0.000762	0.000169		-5.23993	-7.17956	-8.68561		P value	0.1136
0.00251641	0.000341	0.005233				0.000768	0.000272	0.000295		0.00251641	0.000359	0.000768		-5.98492	-7.93219	-7.17172		P value summary	ns
0.00548106	0.001304	0.000847				0.000271	0.000158	0.000369		0.00548106	0.00014	0.000271		-5.20646	-8.87387	-8.21339		Are SDs significantly different (P < 0.05)?	No
0.000932689	0.002186	0.001156				5.15e-05	0.000179	0.000325		0.000932689	0.000628	5.15e-05		-6.97744	-7.37297	-9.87393
0.000523342	0.000327	0.001881				0.000443	0.000206	0.00072		0.000523342	0.000531	0.000443		-7.55528	-7.54075	-7.72194		ANOVA table	SS	DF	MS	F (DFn, DFd)	P value
0.000425176	0.000298	0.001738				0.000552	4.76e-05	0.000895		0.000425176	0.002179	0.000552		-7.76301	-6.12889	-7.50196		Treatment (between columns)	249.7	2	124.9	F (2, 416) = 108.4	P<0.0001
0.00871833	0.00035	0.005556				0.000749	5.15e-05	0.000145		0.00871833	0.002246	0.000749		-4.74233	-6.0986	-7.19677		Residual (within columns)	479.2	416	1.152
0.00252849	0.001742	0.000415				0.00094	0.000157	0.000394		0.00252849	0.001201	0.00094		-5.98013	-6.7246	-6.96963		Total	728.9	418
0.000696112	0.012553	0.000404				0.000325	0.000188	0.000403		0.000696112	0.000344	0.000325		-7.27	-7.97487	-8.03169
0.000702411	0.011396	0.002604				0.000185	0.000227	0.000322		0.000702411	0.001918	0.000185		-7.26099	-6.25647	-8.59515		Data summary
0.000315759	0.009049	0.000737				0.000201	0.00011	0.000233		0.000315759	0.000934	0.000201		-8.06053	-6.97603	-8.51221		Number of treatments (columns)	3
0.0083521	0.004101	0.001316				0.000123	8.7e-05	0.000232		0.0083521		0.000123		-4.78524		-9.00333		Number of values (total)	419
0.00293511	0.00234	0.001275				0.000157	9.18e-05	9.66e-05		0.00293511		0.000157		-5.83101		-8.75926
0.000534822	0.004045	0.001314				5.08e-05	7.1e-05	0.000459		0.000534822		5.08e-05		-7.53358		-9.88761		Tukey's multiple comparisons test	Mean Diff.	95.00% CI of diff.	Below threshold?	Summary	Adjusted P Value
0.00175717	0.001088	0.001704				2.28e-05	8.16e-05	0.000165		0.00175717		2.28e-05		-6.34405		-10.6888		YY-pooled vs. YO-pooled	0.7152	0.2047 to 1.226	Yes	**	0.0031	A-B
0.000937895	0.00052	0.005714				3.65e-05	0.000883	0.000397		0.000937895		3.65e-05		-6.97187		-10.2182		YY-pooled vs. YO-Nox4-/+-pooled	1.598	1.342 to 1.853	Yes	****	<0.0001	A-C
0.00114828	0.002054	0.002772				0.003997	9.83e-05	0.000161		0.00114828		0.003997		-6.76949		-5.52221		YO-pooled vs. YO-Nox4-/+-pooled	0.8825	0.3729 to 1.392	Yes	***	0.0002	B-C
0.000165667	0.001643	0.002272				0.000172	0.000731	0.000959		0.000165667		0.000172		-8.70553		-8.66802
0.00186531	0.00047	0.001527				0.000373	0.001169	0.000407		0.00186531		0.000373		-6.28433		-7.89393		Test details	Mean 1	Mean 2	Mean Diff.	SE of diff.	n1	n2	q	DF
0.00971892	0.000895	0.001556				0.000291	0.000218	0.000921		0.00971892		0.000291		-4.63368		-8.14219		YY-pooled vs. YO-pooled	-6.592	-7.307	0.7152	0.217	193	28	4.66	416
0.00224868	0.000395	0.002361				0.000232	0.000455	0.000184		0.00224868		0.000232		-6.09741		-8.36877		YY-pooled vs. YO-Nox4-/+-pooled	-6.592	-8.189	1.598	0.1086	193	198	20.81	416
0.000352692	0.000378	0.00064				0.000171	0.000134	0.000183		0.000352692		0.000171		-7.94992		-8.67385		YO-pooled vs. YO-Nox4-/+-pooled	-7.307	-8.189	0.8825	0.2167	28	198	5.76	416
0.00220928	0.001572	0.004039				0.000265	0.000706	8.47e-05		0.00220928		0.000265		-6.11509		-8.23578
0.00108386	0.00113	0.000512				8.23e-05	9.1e-05	0.00027		0.00108386		8.23e-05		-6.82722		-9.40514
0.000343953	0.000895	0.000941				0.000582	0.000425	0.000288		0.000343953		0.000582		-7.97501		-7.44904
0.00345492	0.000531	0.007988				8.47e-05	0.000272	6.1e-05		0.00345492		8.47e-05		-5.66796		-9.37639
0.00048382	0.000145	0.009515				0.000261	0.001484	0.000246		0.00048382		0.000261		-7.6338		-8.25099
0.000109933	0.005575	0.000994				0.000571	0.001727	0.000124		0.000109933		0.000571		-9.11564		-7.46812
0.000637218	0.004138	0.002166				0.000639	0.000354	0.001017		0.000637218		0.000639		-7.3584		-7.35561
0.000267539	0.000467	0.000295				0.000327	0.00125	4.13e-05		0.000267539		0.000327		-8.22625		-8.02555
0.000844009	0.001796	0.00226				0.000364	7.85e-05	0.000548		0.000844009		0.000364		-7.07735		-7.91836
0.00424981		0.001488				0.000726	9.74e-05	5.08e-05		0.00424981		0.000726		-5.46088		-7.22796
0.00165331		0.001418				0.001169	0.000806	0.000102		0.00165331		0.001169		-6.40498		-6.75161
0.000449417		0.000643				0.000295	0.000723	5.69e-05		0.000449417		0.000295		-7.70756		-8.12854
0.000546386		0.000394				0.001874	8.62e-05	0.000229		0.000546386		0.001874		-7.51218		-6.27968
0.000590476		0.000883				0.000788	0.000102	0.000108		0.000590476		0.000788		-7.43458		-7.14601
0.000148439		0.001708				0.000471	0.000145	0.000154		0.000148439		0.000471		-8.81534		-7.66065
0.00020092		0.004056				0.000588	5.42e-05	0.000304		0.00020092		0.000588		-8.5126		-7.43878
0.00369638		0.000511				0.000643	0.000138	0.000552		0.00369638		0.000643		-5.6004		-7.34937
0.000493603		0.000554				0.000593	0.000122	0.004828		0.000493603		0.000593		-7.61378		-7.43032
0.000514786		0.000392				0.000373	0.000142	0.000101		0.000514786		0.000373		-7.57176		-7.89393
0.000922307		0.001288				0.000432	0.000286	0.000168		0.000922307		0.000432		-6.98863		-7.74708
0.00118564		0.000786				0.000771	0.000513	0.00036		0.00118564		0.000771		-6.73748		-7.16782
0.00041985		0.000396				0.000487	0.000173	9.66e-05		0.00041985		0.000487		-7.77561		-7.62725
0.00225566		0.000775				0.0014	0.000198	9.18e-05		0.00225566		0.0014		-6.09431		-6.57128
0.00451401		0.002249				0.000238	0.000208	6.81e-05		0.00451401		0.000238		-5.40057		-8.34324
0.00238722		0.000878				0.000164	0.00028	4.63e-05		0.00238722		0.000164		-6.03763		-8.71564
0.000274428		0.004488				0.000164	0.000191	4.89e-05		0.000274428		0.000164		-8.20082		-8.71564
0.00277652		0.002321					0.000153	2.97e-05		0.00277652		0.001165		-5.88656		-6.75503
0.00237064		0.000723						8.54e-05		0.00237064		0.001193		-6.0446		-6.73128
		0.00042								0.001779		0.001252		-6.3317		-6.68301
		0.002228								0.001515		0.00115		-6.49234		-6.76799
		0.003848								0.001781		0.001376		-6.33058		-6.58857
		0.004673								0.00166		0.000749		-6.40094		-7.19677
		0.001386								0.001852		0.001321		-6.29149		-6.62937
		0.000811								0.000247		0.000561		-8.30612		-7.48579
		0.00158								0.000249		0.000861		-8.29806		-7.05742
		0.001298								0.000103		0.000129		-9.18078		-8.9557
		0.000565								0.001468		0.000205		-6.52385		-8.4925
		0.001929								0.000631		9.66e-05		-7.3682		-9.24493
		0.003812								0.002514		0.000133		-5.98588		-8.92516
										0.001753		8.08e-05		-6.34643		-9.42353
										0.001195		3.3e-05		-6.72961		-10.319
										0.000639		1.99e-05		-7.35561		-10.8248
										0.000363		6.17e-05		-7.92111		-9.69323
										0.002159		3.83e-05		-6.13811		-10.1701
										0.001962		0.000272		-6.23379		-8.20971
										0.000283		0.000158		-8.17006		-8.75292
										0.000341		0.000179		-7.98363		-8.62812
										0.001304		0.000206		-6.64232		-8.48763
										0.002186		4.76e-05		-6.12568		-9.95268
										0.000327		5.15e-05		-8.02555		-9.87393
										0.000298		0.000157		-8.11842		-8.75926
										0.00035		0.000188		-7.95758		-8.57907
										0.001742		0.000227		-6.35272		-8.39056
										0.012553		0.00011		-4.3778		-9.11503
										0.011396		8.7e-05		-4.47449		-9.3496
										0.009049		9.18e-05		-4.7051		-9.2959
										0.004101		7.1e-05		-5.49652		-9.55283
										0.00234		8.16e-05		-6.0576		-9.41368
										0.004045		0.000883		-5.51027		-7.03219
										0.001088		9.83e-05		-6.82341		-9.22749
										0.00052		0.000731		-7.56168		-7.2211
										0.002054		0.001169		-6.18797		-6.75161
										0.001643		0.000218		-6.41123		-8.43102
										0.00047		0.000455		-7.66278		-7.69521
										0.000895		0.000134		-7.01869		-8.91767
										0.000395		0.000706		-7.83662		-7.2559
										0.000378		9.1e-05		-7.88062		-9.30465
										0.001572		0.000425		-6.45541		-7.76342
										0.00113		0.000272		-6.78554		-8.20971
										0.000895		0.001484		-7.01869		-6.51301
										0.000531		0.001727		-7.54075		-6.36137
										0.000145		0.000354		-8.83878		-7.94621
										0.005575		0.00125		-5.18946		-6.68461
										0.004138		7.85e-05		-5.48754		-9.45241
										0.000467		9.74e-05		-7.66918		-9.23668
										0.001796		0.000806		-6.32219		-7.12343
										0.029144		0.000723		-3.53551		-7.2321
										0.005512		8.62e-05		-5.20083		-9.35884
										0.009145		0.000102		-4.69455		-9.19054
										0.007949		0.000145		-4.83471		-8.83878
										0.003932		5.42e-05		-5.53861		-9.82283
										0.032317		0.000138		-3.43216		-8.88826
										0.020349		0.000122		-3.89472		-9.01149
										0.007213		0.000142		-4.93187		-8.85968
										0.008302		0.000286		-4.79126		-8.15952
										0.007378		0.000513		-4.90925		-7.57523
										0.00155		0.000173		-6.4695		-8.66222
										0.006545		0.000198		-5.02905		-8.52724
										0.002099		0.000208		-6.16629		-8.47797
										0.017264		0.00028		-4.05913		-8.18072
										0.000863		0.000191		-7.0551		-8.56324
										0.003746		0.000153		-5.58707		-8.78507
										0.001227		0.000261842		-6.70318		-8.24777
										0.004022		0.000486606		-5.51598		-7.62806
										0.005233		0.000253936		-5.25277		-8.27843
										0.000847		0.000330367		-7.07381		-8.01531
										0.001156		0.000341468		-6.76279		-7.98226
										0.001881		0.000467198		-6.27595		-7.66876
										0.001738		0.000276736		-6.35502		-8.19245
										0.005556		0.000369112		-5.19288		-7.90441
										0.000415		0.000297808		-7.78723		-8.11906
										0.000404		0.000911959		-7.8141		-6.99992
										0.002604		0.000256186		-5.95071		-8.26961
										0.000737		0.000248339		-7.21292		-8.30072
										0.001316		0.0043363		-6.63316		-5.44073
										0.001275		0.000123809		-6.66481		-8.99677
										0.001314		0.000290727		-6.63468		-8.14313
										0.001704		0.000777828		-6.37478		-7.15901
										0.005714		0.000781094		-5.16484		-7.15482
										0.002772		0.00327411		-5.88819		-5.72171
										0.002272		0.000295441		-6.08709		-8.12704
										0.001527		0.000369112		-6.48445		-7.90441
										0.001556		0.000325473		-6.46564		-8.03023
										0.002361		0.000719829		-6.04867		-7.2365
										0.00064		0.000894806		-7.35404		-7.0189
										0.004039		0.000144697		-5.51176		-8.84087
										0.000512		0.000393558		-7.57719		-7.84028
										0.000941		0.000402695		-6.96857		-7.81733
										0.007988		0.000321818		-4.82981		-8.04152
										0.009515		0.000232889		-4.65489		-8.36495
										0.000994		0.000231798		-6.91377		-8.36964
										0.002166		9.66172e-05		-6.13487		-9.24475
										0.000295		0.000458962		-8.12854		-7.68654
										0.00226		0.000164693		-6.09239		-8.71143
										0.001488		0.000397465		-6.51032		-7.8304
										0.001418		0.000160818		-6.55851		-8.73524
										0.000643		0.000958809		-7.34937		-6.94982
										0.000394		0.000406632		-7.83916		-7.8076
										0.000883		0.000920576		-7.03219		-6.99051
										0.001708		0.000183514		-6.37243		-8.60322
										0.004056		0.000182506		-5.50756		-8.60873
										0.000511		8.46654e-05		-7.57914		-9.3768
										0.000554		0.000269828		-7.49835		-8.21773
										0.000392		0.000288379		-7.84425		-8.15123
										0.001288		6.10002e-05		-6.65466		-9.70463
										0.000786		0.000246111		-7.14855		-8.30973
										0.000396		0.000123809		-7.8341		-8.99677
										0.000775		0.00101712		-7.16265		-6.89078
										0.002249		4.12959e-05		-6.09727		-10.0947
										0.000878		0.000547834		-7.03786		-7.50954
										0.004488		5.0829e-05		-5.40635		-9.88704
										0.002321		0.000101543		-6.06576		-9.19503
										0.000723		5.68577e-05		-7.2321		-9.77496
										0.00042		0.000228536		-7.77526		-8.38382
										0.002228		0.000108237		-6.10665		-9.13119
										0.003848		0.000154111		-5.5602		-8.77784
										0.004673		0.000303752		-5.36595		-8.0993
										0.001386		0.000552196		-6.58133		-7.50161
										0.000811		0.00482837		-7.11724		-5.33325
										0.00158		0.000100717		-6.45033		-9.2032
										0.001298		0.000167619		-6.64693		-8.69382
										0.000565		0.000360239		-7.47868		-7.92874
										0.001929		9.66172e-05		-6.25075		-9.24475
										0.003812		9.17735e-05		-5.5696		-9.29619
												6.81167e-05				-9.59429
												4.62982e-05				-9.98041
												4.887e-05				-9.92635
												2.96587e-05				-10.4258
												8.54457e-05				-9.36763
