# Supplementary material for: Mesenchymal stromal cell aging impairs the self-organizing capacity of lung alveolar epithelial stem cells
Source: eLife. 2021 Sep 16;10:e68049. doi: 10.7554/eLife.68049 (PMC8445616; doi:10.7554/eLife.68049)
Supplement: Supplementary file 1. [file elife-68049-supp1.xlsx]

## Sheet: Sheet1
Supplementary file 1: Gene Ontology localizations, Processes, and Network Analyses of Mass Spectrometry Data
Mesenchymal Stromal Cell Aging Impairs the Self-Organizing Capacity of Lung Alveolar Epithelial Stem Cells
Diptiman Chanda1, Mohammad Rehan7, Samuel R. Smith1, Kevin G. Dsouza1, Yong Wang1, Karen Bernard1, Deepali Kurundkar1, Vinayak Memula2, Kojima Kyoko3, James A. Mobley4, Gloria A. Benavides5, Victor Darley-Usmar5, Kim Young-il6, Jaroslaw W. Zmijewski1, Jessy S. Deshane1, Stijn P. De Langhe, and Victor J. Thannickal7
1Division of Pulmonary, Allergy, and Critical Care Medicine, Department of Medicine; 2Department of Surgery; 3Comprehensive Cancer Center Mass Spectrometry & Proteomics Shared Facility, 4Department of Anesthesiology and Perioperative Medicine; 5Department of Pathology; 6Division of Preventive Medicine, Department of Medicine; University of Alabama at Birmingham, Birmingham, AL, USA; 7John W. Demi…
Correspondence:
Diptiman Chanda, Ph.D.
Assistant Professor of Medicine
Division of Pulmonary, Allergy, and Critical Care
Department of Medicine
University of Alabama at Birmingham
1900 University Blvd THT 541E, Birmingham, AL 35294-2180
Telephone: (205) 996-2078
Fax: (205) 934-1721
E-mail: dchanda@uab.edu
Or to:
Victor J. Thannickal, M.D.
Professor and Harry B. Greenberg Chair
John W. Deming Department of Medicine
Tulane University School of Medicine
1430 Tulane Avenue, #8512
New Orleans, LA 70112
Office phone: 504-988-7800
Email: vthannickal@tulane.edu

## Sheet: S1A.TopProteins
Supplementary file 1A: Top Significantly Changed Proteins (Aged Vs. Young Mouse L-MSCs)
UniProtKB Name	Gene Name	UProt Acc#	GeneID	NetworkID	GO Function/ Biological Processes	Old(avg)	Y(avg)	SAM	Ttest	Fold(O/Y)
Procollagen-lysine,2-oxoglutarate 5-dioxygenase 1	procollagen-lysine, 2-oxoglutarate 5-dioxygenase 1(Plod1)	Q9R0E2	18822	PLOD1	* oxidoreductase/ H2O2 catabolic/ response to hypoxia/ metal binding/ peptidyl-lysine hydroxylation	5.37967	1.61105	1.3208	0.034032	3.33924
Peroxidasin	peroxidasin(Pxdn)	Q3UQ28	69675	PXDN	* oxidoreductase/ H2O2 catabolic/ metal-heme binding/ peroxidase/ response to ox-stress	9.5617	3.63208	1.07973	0.0264622	2.63257
Integrin beta-2	integrin beta 2(Itgb2)	P11835	16414	Integrin	* HSP-binding/ pos reg NO process/ cell-cell adhesion	2.62095	0	-	-	2.62095
Keratin, type I cytoskeletal 17	keratin 17(Krt17)	Q9QWL7	16667	Keratin 17	intermediate filamate organisation/ pos cell growth	6.73188	2.78924	0.811317	0.0452331	2.41351
Legumain	legumain(Lgmn)	O89017	19141	Legumain	protease/ endopeptidase	5.622	2.54323	0.790618	0.104362	2.21057
Keratin, type II cytoskeletal 2 epidermal	keratin 2(Krt2)	Q3TTY5	16681	Keratin 2	cytoskeletal protein binding/ keratinocyte development	7.89827	3.69132	0.929815	0.0227557	2.13969
Beta-galactosidase	galactosidase, beta 1(Glb1)	P23780	12091	BGAL	* hydrolase activity/ galactose catabolism/ proton donor	2.08747	0	-	-	2.08747
Plastin-3	plastin 3 (T-isoform)(Pls3)	Q99K51	102866	T-plastin	actin filiment binding/	9.89723	4.80893	0.791902	0.0542548	2.05809
ATP-binding cassette sub-family A member 8-B	ATP-binding cassette, sub-family A (ABC1)	Q8K440	27404	ABCA8	ATPase activity/ lipid trasport	4.0765	2.02527	0.831298	0.0594865	2.01281
Collagen alpha-1(XII) chain	collagen, type XII, alpha 1(Col12a1)	Q60847	12816	Collagen XII	hydroxylation/ cell adhesion	52.2855	29.0282	1.16238	0.0144017	1.80119
Aspartyl aminopeptidase	aspartyl aminopeptidase(Dnpep)	Q9Z2W0	13437	Dnpep	metaloprotease/ Zn binding	3.78518	2.1198	1.21743	0.0124916	1.78563
ATP synthase subunit alpha, mitochondrial	ATP synthase, H+ transporting, mitochondrial F1 complex, alpha subunit 1(Atp5a1)	Q03265	11946	ATP5A	ATP metabolic process/ protease binding	1.6349	0	-	-	1.6349
Alpha-enolase	enolase 1, alpha non-neuron(Eno1)	P17182	13806	ENO	* proton donor/ glycolysis/ Mg binding	24.2343	15.8796	0.9611	0.0561308	1.52612
Threonine--tRNA ligase, cytoplasmic	threonyl-tRNA synthetase(Tars)	Q9D0R2	110960	SYTC	Zn binding/ threonyl-tRNA aminoacylation	0	1.45826	-	-	-1.45826
Matrix Gla protein	matrix Gla protein(Mgp)	P19788	17313	MGP	lung development/ Ca binding	6.81055	11.2339	0.953071	0.0358654	-1.64948
NADP-dependent malic enzyme	malic enzyme 1, NADP(+)-dependent, cytosolic(Me1)	P06801	17436	ME1	* oxidoreductase/ proton donor	1.8803	3.1322	0.897184	0.0555	-1.6658
Elongation factor 1-alpha 1	eukaryotic translation elongation factor 1 alpha 1(Eef1a1)	P10126	13627	eEF1A	* GTPase activity/ kinase binding/ neg reg reactive ox species	5.1358	8.8751	0.897988	0.0418768	-1.72809
Lysosome-associated membrane glycoprotein 2	lysosomal-associated membrane protein 2(Lamp2)	P17047	16784	LAMP2	pos autophagy/ reg protein stability	0	1.7384	-	-	-1.7384
Peroxiredoxin-1	peroxiredoxin 1(Prdx1)	P35700	18477	Peroxiredoxin	* oxidoreductase/ peroxidase/ heme binding/ redox homeostatis	8.08847	14.2495	1.04561	0.0133002	-1.7617
Complement component 1, r subcomponent	complement component 1, r subcomponent A(C1ra)	Q566I6	50909	C1RA	serine protease/ hydroxylation/ Ca binding/ complement activation	2.84893	5.45763	1.31389	0.0141165	-1.91567
Latent-transforming growth factor beta-binding protein 1	latent transforming growth factor beta binding protein 1(Ltbp1)	Q8CG19	268977	LTBP1	Ca binding/ hydroxylation/ TGFbeta binding	2.1864	4.2012	1.41897	0.0272106	-1.92151
Stromal cell-derived factor 1	chemokine (C-X-C motif) ligand 12(Cxcl12)	P40224	20315	SDF-1	CXC chemokine activity/ defense response/ cell-cell adhesion	1.4452	2.80523	1.19117	0.0266846	-1.94107
Dickkopf-related protein 3	dickkopf WNT signaling pathway inhibitor 3(Dkk3)	Q9QUN9	50781	DKK3	neg reg Wnt signaling	1.8552	3.66053	1.18007	0.0133451	-1.97312
Peptidyl-prolyl cis-trans isomerase FKBP10	FK506 binding protein 10(Fkbp10)	Q61576	14230	FKBP10	Ca binding/ peptidyl-proline modification	2.1558	4.2661	1.5927	0.0202448	-1.97889
Elastin	elastin(Eln)	P54320	13717	Elastin	hydroxylation/ ECM binding & organization	0	2.07853	-	-	-2.07853
L-lactate dehydrogenase A chain	lactate dehydrogenase A(Ldha)	P06151	16828	LDHA	* oxidoreductase/ LDH activity	6.6072	13.8708	0.781301	0.0431267	-2.09935
Nucleoside diphosphate kinase B	NME/NM23 nucleoside diphosphate kinase 2(Nme2)	Q01768	18103	NDPK B	* kinase acitivity/ ATP binding/ response to ox-stress	5.61413	12.1956	0.96549	0.0288521	-2.17231
C-type mannose receptor 2	mannose receptor, C type 2(Mrc2)	Q64449	17534	ENDO180	collagen binding & catabolism process/ endocytosis	1.43287	3.34487	0.832416	0.0840829	-2.33439
14-3-3 protein epsilon	tyrosine 3-monooxygenase/tryptophan 5-monooxygenase activation protein, epsilon	D6REF3	22627	14-3-3	* response to stress/ oxidoreductase/ cell cycle checkpoint associated	1.44153	3.37027	2.46151	0.0185437	-2.33797
Insulin-like growth factor-binding protein 4	insulin-like growth factor binding protein 4(Igfbp4)	P47879	16010	IBP	regulation of cell growth/ glucose metabolism/ infammation response	2.5763	6.43043	0.805663	0.0760608	-2.496
Ecm1 protein	extracellular matrix protein 1(Ecm1)	B7ZNR0	13601	ECM1	signal transduction	2.95493	7.4133	1.11576	0.0779012	-2.50879
Glyceraldehyde-3-phosphate dehydrogenase	glyceraldehyde-3-phosphate dehydrogenase(Gapdh)	P16858	14433	G3P2	* oxidoreductase/ glycolysis/ aspartate endopeptidase inhibition/	3.42885	8.68175	1.27233	0.00572832	-2.53197
metalloproteinase with thrombospondin motifs 2	metallopeptidase (reprolysin type) with thrombospondin type 1 motif, 2(Adamts2)	Q8C9W3	216725	ADAM-TS2	metaloprotease/ Zn binding/ lung development	1.35065	3.6224	0.867324	0.0958237	-2.68197
Mimecan	osteoglycin(Ogn)	Q62000	18295	Osteoglycin	growth factor/ TGF-beta associated	2.9795	8.64397	1.38718	0.0347441	-2.90115
Stromelysin-1	matrix metallopeptidase 3(Mmp3)	P28862	17392	Stromelysin-1	metaloprotease/ Ca & Zn binding/ hydrolase	6.63557	20.92	1.45533	0.0259051	-3.15271
Gelsolin	gelsolin(Gsn)	P13020	227753	Gelsolin	Ca binding/ actin associated/ aging processes	19.8985	67.3045	2.80301	0.00391911	-3.38239
GO associations were derived from UniProt KB and DAVID GO databases
* ox-stress/ redox associated
Supplemental Table 1A: These data represent the secretory protiens that changed signicantly in abundance between aged vs. young Mouse L-MSCs. Significance was determined by a combination of three tests that include; absolute fold change of >1.5 via Normalized Spectral Counts (NSCs), in addition to an absolute Significance Analysis of Microarray (SAM) of >0.8 and Students t-test with p<0.1 based o…

## Sheet: S1B.GOLocalizations
Supplementary file 1B: GO Localizations
#	Localizations	Total	p-value	FDR	In Data	Network Objects from Active Data
1	cytoplasmic, known to go to extracellular space	4015	7.92038e-18	2.18603e-15	31	PLOD1, SDF-1, eEF1A1, MGP, BGAL, ADAM-TS2, G3P2, Keratin 17, LAMP2, IBP4, Elastin, DKK3, ITGB2, Gelsolin, ATP5A, LDHA, PRDX1, ECM1, 14-3-3 epsilon, LTBP1, SYTC, Osteoglycin, ENO1, Collagen XII, Dnpep, PXDN, NDPK B, Legumain, Stromelysin-1, Keratin 2, C1RA
2	extracellular exosome	2237	5.93469e-15	4.48766e-13	23	PLOD1, SDF-1, eEF1A1, MGP, BGAL, G3P2, Keratin 17, LAMP2, ITGB2, Gelsolin, ATP5A, LDHA, PRDX1, ECM1, 14-3-3 epsilon, SYTC, Osteoglycin, ENO1, Collagen XII, PXDN, NDPK B, Legumain, Keratin 2
3	collagen-containing extracellular matrix	529	4.58452e-09	1.80761e-07	10	PLOD1, SDF-1, MGP, ADAM-TS2, Elastin, ECM1, LTBP1, Osteoglycin, Collagen XII, PXDN
4	extracellular matrix	740	8.36621e-09	2.56564e-07	11	PLOD1, SDF-1, MGP, ADAM-TS2, Elastin, ECM1, LTBP1, Osteoglycin, Collagen XII, PXDN, Stromelysin-1
5	myelin sheath	221	3.69578e-08	1.02004e-06	7	eEF1A1, G3P2, Gelsolin, ATP5A, PRDX1, ENO1, NDPK B
6	lysosomal lumen	101	1.59916e-05	0.000401244	4	BGAL, LAMP2, Osteoglycin, Legumain
7	ficolin-1-rich granule lumen	129	4.18303e-05	0.000824654	4	eEF1A1, BGAL, Gelsolin, NDPK B
8	extracellular matrix component	65	0.000127936	0.00224136	3	Elastin, LTBP1, Collagen XII
9	secretory granule lumen	336	0.000142091	0.00224136	5	eEF1A1, BGAL, Gelsolin, ECM1, NDPK B
10	vacuolar lumen	180	0.000152063	0.00224136	4	BGAL, LAMP2, Osteoglycin, Legumain
11	vesicle lumen	342	0.000154297	0.00224136	5	eEF1A1, BGAL, Gelsolin, ECM1, NDPK B
12	mitochondrion	2183	0.000280944	0.00387703	11	G3P2, Elastin, ABCA8, ATP5A, LDHA, PRDX1, 14-3-3 epsilon, LTBP1, NDPK B, Stromelysin-1, ME1
13	perinuclear region of cytoplasm	884	0.000312871	0.00411202	7	BGAL, G3P2, LAMP2, Gelsolin, LTBP1, NDPK B, Legumain
14	cell-substrate adherens junction	433	0.000456895	0.00548274	5	ITGB2, Gelsolin, 14-3-3 epsilon, ENDO180, NDPK B
15	secretory granule	1002	0.000661698	0.00702418	7	eEF1A1, BGAL, LAMP2, ITGB2, Gelsolin, ECM1, NDPK B
16	cytoplasm	19040	0.000892455	0.00912288	38	PLOD1, SDF-1, eEF1A1, MGP, eEF1A, Peroxiredoxin, BGAL, G3P2, Keratin 17, T-plastin, LAMP2, IBP4, Elastin, ABCA8, ITGB2, Gelsolin, ATP5A, IBP, LDHA, PRDX1, ECM1, 14-3-3 epsilon, FKBP10, ENO, LTBP1, SYTC, Osteoglycin, ENO1, Collagen XII, Dnpep, LAMP2-C, PXDN, 14-3-3, NDPK B, Legumain, Stromelysin-1, ME1, Keratin 2
17	large latent transforming growth factor-beta complex	1	0.00149701	0.0136596	1	LTBP1
18	collagen type XII trimer	1	0.00149701	0.0136596	1	Collagen XII
19	adherens junction	581	0.00169853	0.0136596	5	ITGB2, Gelsolin, 14-3-3 epsilon, ENDO180, NDPK B
20	supramolecular fiber	1179	0.00170295	0.0136596	7	Keratin 17, T-plastin, Elastin, LTBP1, ENO1, NDPK B, Keratin 2
21	endomembrane system	5557	0.00174129	0.0136596	17	PLOD1, eEF1A1, MGP, BGAL, G3P2, LAMP2, IBP4, ITGB2, Gelsolin, ECM1, FKBP10, LTBP1, Osteoglycin, Collagen XII, PXDN, NDPK B, Legumain
22	supramolecular complex	1187	0.00176992	0.0136596	7	Keratin 17, T-plastin, Elastin, LTBP1, ENO1, NDPK B, Keratin 2
23	endoplasmic reticulum lumen	347	0.00178169	0.0136596	4	IBP4, FKBP10, LTBP1, Collagen XII
24	anchoring junction	604	0.00201222	0.0150101	5	ITGB2, Gelsolin, 14-3-3 epsilon, ENDO180, NDPK B
25	secretory vesicle	1232	0.00218593	0.0158767	7	eEF1A1, BGAL, LAMP2, ITGB2, Gelsolin, ECM1, NDPK B
26	vacuole	939	0.0026066	0.0183498	6	eEF1A1, BGAL, LAMP2, Osteoglycin, Dnpep, Legumain
27	integrin alphaL/M-beta2 complex	2	0.00299182	0.0183498	1	ITGB2
28	ruffle	210	0.00383319	0.0229032	3	eEF1A1, Gelsolin, NDPK B
29	membrane raft	433	0.00395071	0.0229032	4	LAMP2, ITGB2, ATP5A, ENO1
30	cytoplasmic vesicle part	1776	0.00437117	0.0241289	8	eEF1A1, BGAL, LAMP2, ITGB2, Gelsolin, ECM1, NDPK B, Legumain
Supplemental Table 1B: The Gene Ontology (GO) Localizations (listed above) were generated via GeneGo (Metacore), where all UniProtKB IDs were converted to a more universal Network ID as listed here and in supplemental table 1A, thereby allowing a cellular location specific database, generated from published reports, to then be used to determine where each of the significantly changed proteins lis…

## Sheet: S1C.GOProcesses
Supplementary file 1C: GO Processes
#	Processes	Total	p-value	FDR	In Data	Network Objects from Active Data
1	negative regulation of reactive oxygen species metabolic process	102	1.34702e-06	0.00101142	4	eEF1A1, eEF1A, Peroxiredoxin, Stromelysin-1
2	extracellular matrix organization	466	1.48738e-06	0.00101142	6	PLOD1, Peroxiredoxin, Collagen XII, PXDN, Gelsolin, Stromelysin-1
3	extracellular structure organization	540	3.48591e-06	0.00158028	6	PLOD1, Peroxiredoxin, Collagen XII, PXDN, Gelsolin, Stromelysin-1
4	cellular component organization	7470	7.83685e-06	0.0021916	16	PLOD1, SDF-1, eEF1A1, FKBP10, MGP, eEF1A, Osteoglycin, Peroxiredoxin, Collagen XII, G3P2, Keratin 17, PXDN, NDPK B, Gelsolin, Stromelysin-1, Keratin 2
5	hydrogen peroxide catabolic process	48	8.05734e-06	0.0021916	3	Peroxiredoxin, PXDN, PRDX1
6	positive regulation of epidermis development	51	9.68606e-06	0.00219551	3	Keratin 17, NDPK B, Keratin 2
7	cellular component organization or biogenesis	7737	1.29749e-05	0.00239704	16	PLOD1, SDF-1, eEF1A1, FKBP10, MGP, eEF1A, Osteoglycin, Peroxiredoxin, Collagen XII, G3P2, Keratin 17, PXDN, NDPK B, Gelsolin, Stromelysin-1, Keratin 2
8	anatomical structure development	7828	1.53364e-05	0.00239704	16	PLOD1, SDF-1, eEF1A1, MGP, LTBP1, eEF1A, Osteoglycin, Peroxiredoxin, Collagen XII, G3P2, Keratin 17, NDPK B, DKK3, Gelsolin, Keratin 2, PRDX1
9	cell killing	193	1.69276e-05	0.00239704	4	SDF-1, Peroxiredoxin, G3P2, PRDX1
10	cell activation	1558	1.76253e-05	0.00239704	8	SDF-1, eEF1A1, eEF1A, Peroxiredoxin, NDPK B, Gelsolin, Keratin 2, PRDX1
11	regulation of chaperone-mediated autophagy	9	2.30958e-05	0.00273589	2	eEF1A1, eEF1A
12	hydrogen peroxide metabolic process	69	2.41402e-05	0.00273589	3	Peroxiredoxin, PXDN, PRDX1
13	developmental process	8282	3.41775e-05	0.00357549	16	PLOD1, SDF-1, eEF1A1, MGP, LTBP1, eEF1A, Osteoglycin, Peroxiredoxin, Collagen XII, G3P2, Keratin 17, NDPK B, DKK3, Gelsolin, Keratin 2, PRDX1
14	cellular response to chemical stimulus	4503	4.60745e-05	0.00397687	12	PLOD1, SDF-1, eEF1A1, LTBP1, eEF1A, Peroxiredoxin, G3P2, PXDN, NDPK B, Gelsolin, Stromelysin-1, PRDX1
15	antibiotic catabolic process	86	4.67336e-05	0.00397687	3	Peroxiredoxin, PXDN, PRDX1
16	multicellular organism development	7341	4.67867e-05	0.00397687	15	SDF-1, eEF1A1, MGP, LTBP1, eEF1A, Osteoglycin, Peroxiredoxin, Collagen XII, G3P2, Keratin 17, NDPK B, DKK3, Gelsolin, Keratin 2, PRDX1
17	leukocyte activation	1334	6.09629e-05	0.00487703	7	SDF-1, eEF1A1, eEF1A, Peroxiredoxin, NDPK B, Gelsolin, PRDX1
18	system development	6534	7.08844e-05	0.00524672	14	SDF-1, eEF1A1, MGP, LTBP1, eEF1A, Osteoglycin, Peroxiredoxin, Collagen XII, Keratin 17, NDPK B, DKK3, Gelsolin, Keratin 2, PRDX1
19	collagen metabolic process	100	7.32997e-05	0.00524672	3	PLOD1, Collagen XII, Stromelysin-1
20	cofactor catabolic process	104	8.23759e-05	0.00543696	3	Peroxiredoxin, PXDN, PRDX1
21	regulation of reactive oxygen species metabolic process	291	8.39531e-05	0.00543696	4	eEF1A1, eEF1A, Peroxiredoxin, Stromelysin-1
22	removal of superoxide radicals	19	0.000109164	0.00638549	2	Peroxiredoxin, PRDX1
23	regulation of epidermis development	115	0.000111046	0.00638549	3	Keratin 17, NDPK B, Keratin 2
24	neutrophil degranulation	624	0.000123782	0.00638549	5	eEF1A1, eEF1A, Peroxiredoxin, NDPK B, Gelsolin
25	neutrophil activation involved in immune response	628	0.000127548	0.00638549	5	eEF1A1, eEF1A, Peroxiredoxin, NDPK B, Gelsolin
26	immune response	2684	0.000129873	0.00638549	9	SDF-1, eEF1A1, eEF1A, Peroxiredoxin, G3P2, PXDN, NDPK B, Gelsolin, PRDX1
27	supramolecular fiber organization	632	0.000131401	0.00638549	5	PLOD1, Collagen XII, Keratin 17, Gelsolin, Keratin 2
28	neutrophil activation	637	0.000136343	0.00638549	5	eEF1A1, eEF1A, Peroxiredoxin, NDPK B, Gelsolin
29	granulocyte activation	642	0.000141427	0.00638549	5	eEF1A1, eEF1A, Peroxiredoxin, NDPK B, Gelsolin
30	neutrophil mediated immunity	644	0.000143501	0.00638549	5	eEF1A1, eEF1A, Peroxiredoxin, NDPK B, Gelsolin
31	cellular oxidant detoxification	126	0.000145552	0.00638549	3	Peroxiredoxin, PXDN, PRDX1
32	leukocyte mediated immunity	1054	0.000150791	0.0064086	6	eEF1A1, eEF1A, Peroxiredoxin, NDPK B, Gelsolin, PRDX1
33	leukocyte degranulation	658	0.000158683	0.0065319	5	eEF1A1, eEF1A, Peroxiredoxin, NDPK B, Gelsolin
34	cellular detoxification	131	0.000163297	0.0065319	3	Peroxiredoxin, PXDN, PRDX1
35	cellular response to superoxide	24	0.000175761	0.00661561	2	Peroxiredoxin, PRDX1
36	cellular response to oxygen radical	24	0.000175761	0.00661561	2	Peroxiredoxin, PRDX1
37	response to oxidative stress	676	0.000179984	0.00661561	5	Peroxiredoxin, PXDN, NDPK B, Stromelysin-1, PRDX1
38	myeloid cell activation involved in immune response	683	0.000188835	0.00673666	5	eEF1A1, eEF1A, Peroxiredoxin, NDPK B, Gelsolin
39	myeloid leukocyte mediated immunity	689	0.000196685	0.00673666	5	eEF1A1, eEF1A, Peroxiredoxin, NDPK B, Gelsolin
40	response to inorganic substance	1108	0.000198137	0.00673666	6	MGP, eEF1A, Peroxiredoxin, Gelsolin, Stromelysin-1, PRDX1
41	response to superoxide	28	0.000240241	0.00796897	2	Peroxiredoxin, PRDX1
42	cellular response to oxidative stress	394	0.000268619	0.00869815	4	Peroxiredoxin, NDPK B, Stromelysin-1, PRDX1
43	detoxification	159	0.0002889	0.00912118	3	Peroxiredoxin, PXDN, PRDX1
44	response to oxygen radical	31	0.000295097	0.00912118	2	Peroxiredoxin, PRDX1
45	intermediate filament organization	32	0.000314615	0.00930166	2	Keratin 17, Keratin 2
46	regulation of hydrogen peroxide metabolic process	32	0.000314615	0.00930166	2	Peroxiredoxin, Stromelysin-1
47	reactive oxygen species metabolic process	167	0.000333641	0.00965428	3	Peroxiredoxin, PXDN, PRDX1
48	myeloid leukocyte activation	780	0.000349341	0.009898	5	eEF1A1, eEF1A, Peroxiredoxin, NDPK B, Gelsolin
49	leukocyte activation involved in immune response	833	0.000472413	0.0131119	5	eEF1A1, eEF1A, Peroxiredoxin, NDPK B, Gelsolin
50	cell activation involved in immune response	837	0.000482881	0.0131344	5	eEF1A1, eEF1A, Peroxiredoxin, NDPK B, Gelsolin
Supplemental Table 1C: The Gene Ontology (GO) Processes (listed above) were generated via GeneGo (Metacore), where all UniProtKB IDs were converted to a more universal Network ID as listed here and in supplemental table 1A, thereby allowing a cell-biology associated process specific database, generated from published reports, to then be used to determine where each of the significantly changed pr…

## Sheet: S1D.TopToxicPathologies
Supplementary file 1D: Top Toxic Pathologies
#	Toxic pathologies	Total	p-value	FDR	In Data	Network Objects from Active Data
1	Lung-fibrosis	396	0.00143821	0.459509	8	SDF-1, Peroxiredoxin, Elastin, LDHA, PRDX1, FKBP10, Integrin, Stromelysin-1
2	Hippocampus-apoptosis	281	0.00500151	0.475329	6	Peroxiredoxin, 14-3-3 epsilon, ENO, ENO1, Integrin, 14-3-3
3	Brain lesions	530	0.00902321	0.640648	8	SDF-1, Peroxiredoxin, ATP5A, 14-3-3 epsilon, ENO, ENO1, Integrin, 14-3-3
4	Intestine-proliferation	367	0.0178366	0.644177	6	IBP, LDHA, Integrin, NDPK B, Stromelysin-1, ME1
5	Brain-lipid peroxidation	489	0.0201492	0.644177	7	Peroxiredoxin, ATP5A, 14-3-3 epsilon, ENO, ENO1, Integrin, 14-3-3
6	Lung-inflammation	390	0.0234791	0.644177	6	SDF-1, Peroxiredoxin, Elastin, PRDX1, Integrin, Stromelysin-1
7	Lung pathology	920	0.0302858	0.644177	10	SDF-1, Peroxiredoxin, Elastin, IBP, LDHA, PRDX1, FKBP10, ENO, Integrin, Stromelysin-1
8	Brain-degeneration	426	0.0346157	0.644177	6	Peroxiredoxin, 14-3-3 epsilon, ENO, ENO1, Integrin, 14-3-3
Supplemental Table 1D: The Gene Ontology (GO) associated Tox Pathologies (listed above) were generated via GeneGo (Metacore), where all UniProtKB IDs were converted to a more universal Network ID as listed here and in supplemental table 1A, thereby allowing a published toxicity-associted biologies database, generated from published reports, to then be used to determine where each of the significa…

## Sheet: S1E.TopNetworks
Supplementary file 1E: Top Networks
#	Network	GO processes	Total nodes	Seed nodes	p-Value	zScore	gScore
1	c-Myc, Oct-3/4, SOX9, MITF, Cyclin D1	canonical Wnt signaling pathway (23.5%; 1.510e-21), cell-cell signaling by wnt (29.4%; 1.362e-17), Wnt signaling pathway (29.4%; 1.362e-17), regulation of canonical Wnt signaling pathway (26.5%; 3.388e-17), cell surface receptor signaling pathway involved in cell-cell signaling (30.9%; 5.320e-17)	68	36	3.75e-128	350.13	350.13
2	NDPK B, p53, ETS1, Rb protein, IGF-1	regulation of cell population proliferation (65.2%; 6.772e-36), negative regulation of cell population proliferation (47.8%; 1.135e-33), regulation of cell death (52.2%; 1.828e-22), negative regulation of cellular process (76.1%; 4.205e-22), response to endogenous stimulus (52.2%; 9.625e-22)	95	36	2.96e-121	296.21	296.21
3	NDPK B, TGF-beta 1, MNT, GAS1, MAD4	regulation of cell population proliferation (58.8%; 1.719e-25), cellular response to organic substance (67.5%; 1.209e-24), response to organic substance (73.8%; 4.263e-24), cellular response to chemical stimulus (71.2%; 8.126e-24), negative regulation of cell population proliferation (41.2%; 5.144e-23)	80	34	6.92e-116	304.86	304.86
4	Elk-1, FOXO3A, CDC25C, CDK7, Bax	cell cycle process (51.8%; 3.296e-41), cell cycle (54.5%; 1.619e-38), mitotic cell cycle process (39.1%; 4.211e-34), mitotic cell cycle (41.8%; 1.276e-33), regulation of cell cycle process (40.9%; 8.285e-32)	111	33	7.78e-106	251.17	251.17
5	PRDX1, Oxidized thioredoxin, Thioredoxin, Sirtuin1, KEAP1	response to endogenous stimulus (68.5%; 2.135e-30), response to hormone (58.9%; 3.692e-29), response to oxygen-containing compound (65.8%; 2.108e-26), response to organic substance (78.1%; 1.624e-25), cellular response to oxygen-containing compound (56.2%; 1.625e-25)	88	28	1.32e-90	247.96	247.96
6	G3P2, SIAH1, Norepinephrine extracellular region, IGF-1, Insulin processed	response to hormone (62.2%; 2.238e-20), response to peptide (48.9%; 3.392e-19), cellular response to oxygen-containing compound (60.0%; 2.686e-18), response to endogenous stimulus (66.7%; 2.956e-18), response to oxygen-containing compound (66.7%; 2.906e-17)	53	21	1.9e-69	238.16	238.16
Supplemental Table 1E: The Gene Ontology (GO) associated Networks (listed above) were generated via GeneGo (Metacore), where all UniProtKB IDs were converted to a more universal Network ID as listed here and in supplemental table 1A, thereby allowing a published network-associted biologies database, generated from published reports, to then be used to determine where each of the significantly cha…
